# Supplementary material
Source: PubMed Central journal article supplement (PMC7704938)
Supplement: NIHMS1644588-supplement-1644588_supp_info.pdf [file NIHMS1644588-supplement-1644588_supp_info.pdf]

## **Supplementary information**

---

# Genetically modified mouse models to help fight COVID-19

---

In the format provided by the authors and unedited

## General notes

- The information presented in the first two columns of the Table 1 (included in the main article) is copied here for the convenience to the reader.

| Model # | Name                                                              |
|---------|-------------------------------------------------------------------|
| 1       | B6.mAce2 <sup>KO</sup> -hACE2 <sup>KI</sup>                       |
| 2       | B6.mAce2 <sup>KO</sup> -hACE2-P2A-EGFP <sup>KI</sup>              |
| 3       | NSG.mAce2 <sup>KO</sup> -hACE2 <sup>KI</sup>                      |
| 4       | NSG.mAce2 <sup>KO</sup> -hACE2-P2A-EGFP <sup>KI</sup>             |
| 5       | BALB/c.mAce2 <sup>KO</sup> -hACE2 <sup>KI</sup>                   |
| 6       | BALB/c.mAce2 <sup>KO</sup> -hACE2-P2A-EGFP <sup>KI</sup>          |
| 7       | B6.mAce2 <sup>KI-31K,82M,353K</sup>                               |
| 8       | NSG.mAce2 <sup>KI-31K,82M,353K</sup>                              |
| 9       | BALB/c.mAce2 <sup>KI-31K,82M,353K</sup>                           |
| 10      | B6.mAce2 <sup>KO</sup> -hACE2-P2A-hTMPRSS2 <sup>KI</sup>          |
| 11      | NSG.mAce2 <sup>KO</sup> -hACE2-P2A-hTMPRSS2 <sup>KI</sup>         |
| 12      | BALB/c.mAce2 <sup>KO</sup> -hACE2-P2A-hTMPRSS2 <sup>KI</sup>      |
| 13      | B6.mAce2 <sup>KO</sup> -hACE2-IRES-hTMPRSS2 <sup>KI</sup>         |
| 14      | NSG.mAce2 <sup>KO</sup> -hACE2-IRES-hTMPRSS2 <sup>KI</sup>        |
| 15      | BALB/c.mAce2 <sup>KO</sup> -hACE2-IRES-hTMPRSS2 <sup>KI</sup>     |
| 16      | ROSA26 <sup>(ACTB-Lox-hACE2-P2A-tdT-Lox-EGFP)</sup>               |
| 17      | ROSA26 <sup>(ACTB-Lox-hACE2-IRES-tdT-Lox-EGFP)</sup>              |
| 18      | ROSA26 <sup>(ACTB-Lox-tdT-Lox-hACE2-P2A-EGFP)</sup>               |
| 19      | ROSA26 <sup>(ACTB-Lox-tdT-Lox-hACE2-IRES-EGFP)</sup>              |
| 20      | Ai63-TIGRE-TRE-hACE2-P2A-tdT                                      |
| 21      | Ai63-TIGRE-TRE-hACE2-IRES-tdT                                     |
| 22      | B6.mAce2 <sup>ckKO</sup> -hACE2 <sup>ckKI</sup>                   |
| 23      | NSG.mAce2 <sup>ckKO</sup> -hACE2 <sup>ckKI</sup>                  |
| 24      | BALB/c.mAce2 <sup>ckKO</sup> -hACE2 <sup>ckKI</sup>               |
| 25      | B6.mAce2 <sup>ckKO</sup> -hACE2-P2A-hTMPRSS2 <sup>ckKI</sup>      |
| 26      | NSG.mAce2 <sup>ckKO</sup> -hACE2-P2A-hTMPRSS2 <sup>ckKI</sup>     |
| 27      | BALB/c.mAce2 <sup>ckKO</sup> -hACE2-P2A-hTMPRSS2 <sup>ckKI</sup>  |
| 28      | B6.mAce2 <sup>ckKO</sup> -hACE2-IRES-hTMPRSS2 <sup>ckKI</sup>     |
| 29      | NSG.mAce2 <sup>ckKO</sup> -hACE2-IRES-hTMPRSS2 <sup>ckKI</sup>    |
| 30      | BALB/c.mAce2 <sup>ckKO</sup> -hACE2-IRES-hTMPRSS2 <sup>ckKI</sup> |

- The rationale for creating these models, and their advantages/disadvantages are described in the main article, wherever possible. Additional information relevant to specific models is included as 'notes' at the beginning the description for each model.
- For convenience, we have included schematics and parts of the figures that are presented in the main article.
- The nucleotide sequences of all the designs and the constructs were derived from the sequences available from ensemble.org web portal. Specifically, all sequences used for guide design are from the C57BL/6 mouse strain, even though some proposed models are meant to be created in other strains (NSG/NOG and BALB/c). We strongly recommend that researchers double-check the accuracy of the sequences and designs before proceeding with generating the model(s).
- Various elements in the schematics, and the nucleotide sequences, are displayed with matching colors.



**Models #2 #4 and #6**

- 2) *B6.mAce2<sup>KO</sup>-hACE2-P2A-EGFP<sup>KI</sup>*
- 4) *NSG.mAce2<sup>KO</sup>-hACE2-P2A-EGFP<sup>KI</sup>*
- 6) *BALB/c.mAce2<sup>KO</sup>-hACE2-P2A-EGFP<sup>KI</sup>*

**Notes:**

- a. The goal is to swap the insertion cassette into the *mAce2* genomic locus between the start and stop codons. All the mouse introns between the coding exons will be deleted.
- b. The mouse sequence was derived from the transcript, [https://uswest.ensembl.org/Mus\\_musculus/Transcript/Exons?db=core;g=ENSMUSG00000015405;r=X:164139332-164188420;t=ENSMUST00000112271](https://uswest.ensembl.org/Mus_musculus/Transcript/Exons?db=core;g=ENSMUSG00000015405;r=X:164139332-164188420;t=ENSMUST00000112271). Exon 1 is noncoding.

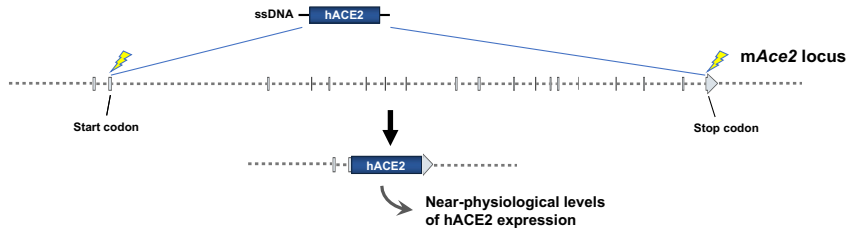

Sequence near the insertion site (the cleavage location expected for the chosen guide RNA is marked as '/').

**cggggaagatgtccagctcc/tcctgg:::ccttt/agcaaagcactgtcatcttctg**

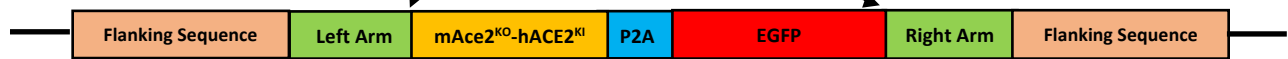

Left gRNA Sequence - GAAAGATGTCCAGCTCCTCC [TGG]

Right gRNA Sequence - ATGACAAGTGCTTTGCTAAA [AGG]

Sequence of the *mAce2<sup>KO</sup>-hACE2-P2A-EGFP<sup>KI</sup>* ssDNA donor:

```
TTTCTAGGATTAATGAATAACATGTCTTTATTTAGTTTACTTAAAAAATCATTCTAAAATATCTGTTTACATATCTGTCTCTCCAGGATTAACCTTCATAT
TGGTCCAGCAGCTTGTACTGTCTCTCTGTTTCTTCTCTGCTTTTTTCTTCTCTCTCAGTGCCCAACCCAAAGTTCAAAGGCTGATGAGAGAGA
AAAACTCATGAAGAGATTTTACTCTAGGGAAGTTGCTCAGTGGATGGGATCTTGGCGCACGGGGAAAGATGTCAGCTCaTCTGGCTCCTTCTCAGCC
TTGTGCTGTAACTGTCTCAGTCCACCTTGAAGAACAGCCCAAGCATTTTTGGACAAGTTTAAACCAGAACCCAAAGACCTGTTCTATCAAAGTTC
ACTTGTCTTGTGAATTATAACCACTAATTACTGAAGAGAATGTCCAAAACATGAATAATGCTGGGGACAAATGGTCTGCCTTTTTAAAGGAAAGCAGTCC
ACACTTGCCCAAAATGTATCCACTACAAGAAATTCAGAATCTCACAGTCAAGTTCAGCTGCAGGCTCTTCAGCAAAATGGGTCTTCAGTGTCTCAGAAG
ACAAGAGCAAAACGGTTGAACAAATCTAAATACAATGAGCACCATCTACAGTACTGGGAAAGTTTGTAAACCAGATAATCCACAAGAAATGCTATTACT
TGAAACAGGTTGAATGAATAATGGCAACAGTTAGACTACAATGAGAGGCTCTGGGCTTGGGAAAGCTGGAGATCTGAGGTCGGCAAGCAGCTGA
GGCCATATATGAAGAGTATGTGGTCTTGAATAATGAGATGGCAAGAGCAAAATCATTATGAGGACTATGGGGATTATTGGAGAGGAGACTATGAAGTAA
ATGGGGTAGATGGCTATGACTACAGCCGCGCCAGTTGATTGAAGATGTGGAACATACCTTTGAAGAGATTAACCCATATATGAACATCTCATGCTT
ATGTGAGGGCAAAAGTTGATGAATGCCTATCTCTTATATCAGTCCAAATGGATGCCTCCTGTCTATTGCTTGGTATATGTTGGGTAGATTTGGAC
AAATCTGTACTTTTGACAGTTCCTTTGGACAGAAACCAACATGATGTACTGTAGTCAATGGTGGACCAAGGCTGGGATGCCAGAGAATATTCAA
GGAGGCCGAGAAGTTCTTGTATCTGTTGGTCTTCTAATATGACTCAAGGATCTGGGAAAATTCATGCTAACGGACCCAGGAAATGTTTCAGAAAAGC
AGTCTGCCATCCACAGCTTGGGACCTGGGGAAGGGCGACTTCAGGATCCTTATGTGCACAAAGGTGACAAATGGACGACTTCTGACAGCTCATCATGA
GATGGGGCATATCCAGTATGATATGGCATATGCTGCACAACTTTCTGTCTAAGAAATGGAGCTAATGAAGGATTCCATGAAGCTGTTGGGGAATCAT
GTCACTTCTGACGCCACCTAAGCATTAAAAATCCATTGGTCTTCTGTCAACCCGATTTTCAAGAAGACAATGAAACAGAAATAAACTTCTGCTCAA
CAAGCACTCAGGATGTTGGGACTGTGCCATTTACTTACATGTTAGAGAAGTGGAGTGGATGGTCTTTAAAGGGGAAATTCCTCAAGACCAAGTGGATG
AAAAAGTGGTGGGAGATGAAGCGAGAGATAGTTGGGGTGGTGGAACTGTGCCCATGATGAAACATACTGTGACCCCGCATCTCTGTTCCATGTTTCT
AATGATTACTCATTTCATCGATATACAAAGACCTTTAACAATTCAGTTTCAAGAAAGCATTGTCAAAGCAGCTAAACATGAAGGCCCTGACACA
AATGTGACATCTCAAACCTCAGAGAAGCTGGACAGAAACTGTTCAAATGTCTGAGGCTTGGAAAATCAGAACCCTGGACCTTAGCATTGGAAAATGTTG
TAGGAGCAAAAGACATGAATGTAAGGCCACTGCTCAACTACTTTGAGCCCTTATTTACCTGGCTGAAAGACCAGAAACAAGAAATCTTTTGTGGGATGGA
GTACCGACTGGAGTCCATATGCAGACCAAAAGCATCAAAGTGAGGATAAGCCTAAAATCAGCTCTGGAGATAAAGCATATGAATGGAACGACAATGAAA
TGTACCTGTTCCGATCATCTGTTGCATATGCTATGAGGCAGTACTTTTAAAAGTAAAAAATCAGATGATCTTTTTGGGGAGGAGGATGTGCGAGTGGC
TAATTTGAAACCAAGAAATCTCCTTAAATTTCTTTGTCAGTGCACCTAAAATGTGCTGATATCATTCCTAGAAGTGAAGTTGAAAAGGCCATCAGGATG
TCCCGGAGCCGTATCAATGATGCTTTCCGCTGTAATGACAACAGCCTAGAGTTTCTGGGATACAGCCAACACTTGGACCTCTAACCCAGCCCTGTT
TCCATATGGCTGATTGTTTTGGAGTTGTATGGGAGTGTATGGTGGTGGCATTGTCATCTTGAATCTTCACTGGGATCAGAGATCGGAAAGAAGAAAAT
AAAAGCAAGAGTGGGAAAATCCTTATGCCTCCATCGATATGACAAAGGAGAAAATAATCCAGGATTCAAAACACTGATGATGTTTCAGACCTCaTTTG
GAAGCGGACTACTAaCTTCAAGCTGCTGAAGCAGGCTGGAGAGCTGGAGGAGAACCCTGGACCTATGGTGAGCAAGGGCGAGGAGCTGTTTACCGG
GGTGGTGGCCATCTGGTTCAGCTGGACGGCGAGTAAACGGCCACAAGTTTCAAGCTGTCCGGGAGGGCGAGGGCGATGCCACTACGGCAAGCTG
ACCTGAAGTTTCACTGCACACCCGCAAGCTGCCGCTGCCCTGGCCACCCTCGTGAACCCCTGACTACGGCGTGCAGTGTCTCAGCCGCTACCCC
GACCACATGAAGCAGCAGCACTTCTCAAGTCCGCCATGCCGAAGGCTACGCTCAGGAGCGCACCATCTTCTCAAGGACGACGGCAACTACAAGACC
CGCGCCGAGGTGAAGTTCGAGGGCGACACCTGGTGAACCCGATCGAGCTGAAGGGATCGACTTCAAGGAGGACGGCAACATCTGGGGACAAGCT
GGAGTCAACTACAACGCCACAACGCTATATCATGCCCAGCAAGCAGAAGAAGCCGATCAAGGTGAACCTCAAGATCCGCCACAACATCGAGGACG
GCAGCTCAGCTCGCCGACCACTACAGCAGAAACACCCCATCGGCGACGGCCCGCTGCTGCTGCCGCAACCACTACCTAGCAGCCGATCCCGCC
CTGAGCAAAAGCCCAAGCAGAGAAGCGGATCACATGGTCTGTGAGTTCGTGACCCGCGGGATCACTCTGGCATGGACGAGCTGTACAAGTA
ATAGAAAAGCACTTGTCTCTTCTTGTATGTAATGCTAACTTCATGATACACAATAATGAGAGTATACACATGTCAATAGTATCAAAAATATGATCT
GTTCAAGTAAACGTTTCCAAAAGAGCATCAGACTTGAGTGGACATCTTCACTGACATTTGCTTTCAGTATTTATTTCTGCCTAAGGATTTGACATCTCTCT
GTTTATTAATAGAGATGTTTATCTTAGCATA
```

## Models #7, #8 and #9

- 7) *B6.mAce2*<sup>KI-31K, 82M, 353K</sup>
- 8) *NSG.mAce2*<sup>KI-31K, 82M, 353K</sup>
- 9) *BALB/c.mAce2*<sup>KI-31K, 82M, 353K</sup>

### Notes:

- a. The goal is to create point mutations changing the coding sequence of *mAce2* to that of *hACE2*.
- b. There are three amino acid differences between *mACE2* and *hACE2* that are thought to be important for binding to the SARS-CoV-2 spike protein: N31K, S82M and H353K (Luan, et al., 2020. *Biochem. Biophys. Res. Commun.* **526**, 165–169).

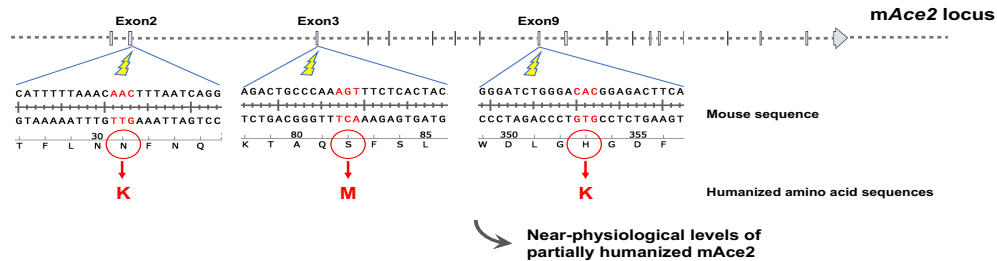

### *mACE2*<sup>KI-31K</sup>

Additional note for the 31K mutation: Human and mouse ACE2 differ in this exonic region by three amino acids; 30, 31 and 34. Because they are close to each other, and because there is no gRNA site close to codon 31, we propose changing codons 30 (N to D) and 34 (Q to D) in addition to 31 (N to K) by using two flanking guide RNAs to remove the entire region and replace it with the complete humanized sequence.

#### Wild type Sequence (codons 30, 31 and 34 are shown in bold)

GGAAAGATGTCCAGCTCCTCCTGGCTCCTTCTCAGCCTTGTTGCTGTTACTACTGCTCAGTCCCTCACCGAGGAAAA  
 TGCCAAGACATTTTTTAAACAACTTTAATCAGGAAGCTGAAGACCTGTCTTATCAAAGTTCACCTTGCTTCTTGAAT  
 TATAATACTAACATTACTGAAGAAAATGCCCA

Left gRNA Sequence - TACTGCTCAGTCCCTCACCG [AGG]

Right gRNA Sequence - CAAGTGAACCTTTGATAAGAC [AGG]

#### 31K Donor Sequence

GGAAAGATGTCCAGCTCCTCCTGGCTCCTTCTCAGCCTTGTTGCTGTTACTACTGCTCAGTCCCTCACCGAAGAAAA  
 TGCCAAGACATTTTTTAA**g4CAAA**TTTAAT**g4c**GAAGCTGAAGA**g**CTGTCTTATCAAAGTTCACCTTGCTTCTTGAATTAT  
 AATACTAACATTACTGAAGAAAATGCCCA

Note: Yellow highlighted, lower case letters are the silent mutations introduced to prevent Cas9 re-cleavage. The codons that are changed are highlighted in red.

### *mACE2*<sup>KI-82M</sup>

#### Wild type Sequence (codon 82 is shown in bold)

AGTGAGGCTGCAGCCAAATGGTCTGCCTTTTATGAAGAACAGTCTAAGACTGCCCAA**AGT**TTCTCACTACAAGAA  
 ATCCAGACTCCGATCATCAAGCGTCAACTACAGGCCCTTCAGCAA

gRNA Sequence - TTCTTGATGAGAACTTT [GGG]

#### 82M Donor Sequence

AGTGAGGCTGCAGCCAAATGGTCTGCCTTTTATGAAGAACAGTCTAAGACTGCCCAA**Atg**TTCTCACTACAAGAA  
 TCCAGACTCCGATCATCAAGCGTCAACTACAGGCCCTTCAGCAA

### *mACE2*<sup>KI-353K</sup>

#### Wild type Sequence (codon 353 is shown in bold)

GCTGACTGAGCCAGCAGATGGCCGGAAAGTTGTCTGCCACCCACAGCTTGGGATCTGGGAC**CAC**GGAGACTTCAG  
 GTAGTTGGGTTGTCACTTACAGTGCAGCTACTAAGTGAGAAACAG

gRNA Sequence - ACAGCTTGGGATCTGGGACA [CGG]

#### 353K Donor Sequence

GCTGACTGAGCCAGCAGATGGCCGGAAAGTTGTCTGCCACCCACAGCTTGGGATCTGGGA**aAg**GGAGACTTCAGG  
 TAGTTGGGTTGTCACTTACAGTGCAGCTACTAAGTGAGAAACAG

**Models #10, #11 and #12**

- 10) *B6.mAce2<sup>KO</sup>-hACE2-P2A-hTMPRSS2<sup>KI</sup>*
- 11) *NSG.mAce2<sup>KO</sup>-hACE2-P2A-hTMPRSS2<sup>KI</sup>*
- 12) *BALB/c.mAce2<sup>KO</sup>-hACE2-P2A-hTMPRSS2<sup>KI</sup>*

**Notes:**

- a. The goal is to swap a hACE2-P2A-hTMPRSS2 cassette into the *mAce2* locus between the start and stop codons in three different genetic backgrounds. All the mouse introns between the coding exons will be deleted.
- b. The mouse sequence was derived from the transcript; [https://uswest.ensembl.org/Mus\\_musculus/Transcript/Exons?db=core;g=ENSMUSG0000015405;r=X:164139332-164188420;t=ENSMUST00000112271](https://uswest.ensembl.org/Mus_musculus/Transcript/Exons?db=core;g=ENSMUSG0000015405;r=X:164139332-164188420;t=ENSMUST00000112271). Exon 1 is noncoding.

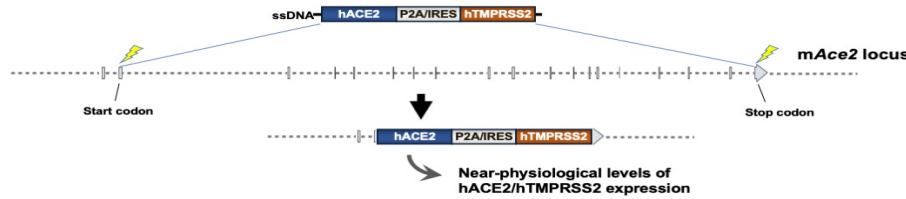

Sequence near the insertion site (the cleavage location expected for the chosen guide RNA is marked as '/').

**cggggaaagatgtccagctcc/tcctgg:::ccttt/agcaaagcactgtcatcttctg**

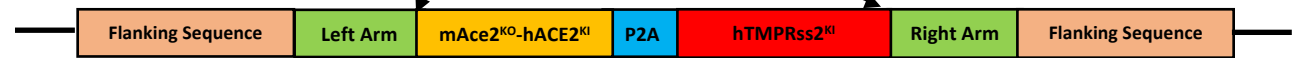

Left gRNA Sequence - GAAAGATGTCCAGCTCCTCC [TGG]

Right gRNA Sequence - ATGACAAGTGCTTTGCTAAA [AGG]

Sequence of the *mAce2<sup>KO</sup>-hACE2-P2A-hTMPRSS2<sup>KI</sup>* ssDNA donor:

TATAGTAAATCATAGTACACCCTCCTCCAGTGTATCTTTAAACAGCTTTAAAGGAACATATTAACATAAATGTCAGGTTTTGATTGGCCATAAAATGTTAGCAAA  
GCTAAGGTTTTCTAGGATTAATGAATAACATGCTTTATTTAGTTTAACTTAAATAAATCACTTAAATAATATCTGTTTACATACTGCTCTCCAGGATTAACITCATAT  
TGGTCCAGCAGCTTGTTACTGTTCTCTCTGTTCTTCTGCTTTTTTTCTCTCTCTCAGTGCCCAACCAAGTTCAAAGGCTGATGAGAGAGAAAACTCA  
TGAAGAGATTTTACTAGGGAAAGTTGCTCAGTGGATGGGATCTTGGCGCACGGGGAAAGATGTCAGCTCaTGTGGCTCTCTCAGCCITGTTGCTGTAACCTGC  
TGCTCAGTCCACCATTGAGGAACAGGCCAAGACATTTTGGACAAGTTTAAACCACGAAGCCGAAGACCTGTCTATCAAAGTTCACITGCTCTTGGAAATTATAAC  
CAATATTACTGAAGAGAATGTCACAAACATGAATAATGCTGGGGACAAATGGTCTGCCTTTTTAAAGGAACAGTCCACACTGGCCAAATGTATCCACTACAGAAAT  
TCAGAATCTCACAGTCAAGCTTCAGCTGCAGGCTCTCAGCAAAATGGGCTTCAGTGTCTCAGAAAGACAAGAGCAAACCGTTGAACCAAAATCTAAATACAAATGAG  
CACCATCTACAGTACTGGAAAGTTTGAACCCAGATAATCCACAAAGAAATGCTTAACTTGAACCAAGTTCGAATGAAATAATGGCAAAAGTTCAGACTACAATGA  
GAGGCTCTGGGCTTGGAAAGCTGGAGATCTGAGGTCGCAAGCACTGAGGCTGAGGCTTATATGAAGAGATGTGGTCTTGAATAATGAGATGGCAAGGCAAAATCATT  
ATGAGGACTATGGGATTTTGGAGAGGAGACTATGAAGTAAATGGGGTAGATGGCTATGACTACAGCCGGGCCAGTTGATTGAAGATGTGGAACATACCTTTGAA  
GAGATTAACCCATTATGAACATCTTCATGCCATGTGAGGGCAAGGTGATGAATGCCATCTCTCTATATCAGTCCAATTTGGATGGCTCCCTGCTCATTGTGCTG  
GTGATATGGGGTAGATTTTGGACAATCTGTACTCTTTGACAGTTCCTTTGGACAGAAACCAATAGATGTTACTGTGCAATGGTGGACCAGGCCCTGGGATG  
CACAGAGAATTTCAAGGAGGCCGAGAAGTCTTTGTATCTGTTGGTCTTCCTAATATGACTCAAGGATTTGGGAAAAATCCATGCTAACCGGACCAGGAAATGTT  
AGAAAGCAGTCTGCCATCCACAGCTTGGGACCTGGGAAAGGGCGACTTCAGGATCTTATGTCACAAAGGTGACAATGGACGACTCTCTGACAGCTCATATGAG  
ATGGGCGATATCCAGTATGATATGGCATATGCTGCACAACCTTTCTGCTGAAGAAATGGAGCTAAAGAAAGGATTCATGAAGCTGTGGGAAAAATCATGCTACTTCT  
GCAGCCACCTAAGCATTTAAATCAATTTGGTCTCTGTCACCCGATTTTCAAGAAGACAATGAAACAGAAATAAACCTCTGCTCAAAACCAAGCTCAGCATTTGTT  
GGGACTCTGCCATTTACTTACTATGTTAGAGAAGTGGAGGTGGATGGTCTTTAAAGGGAAATTTCCAAAGACCAAGTGGATGAAAAAGTGGTGGGAGATGAAGCGAGA  
GATAGTGGGGTGGTGGAACTGTGCCCATGATGAACATACTGTGACCCCGCATCTGTGTCATGTTCTTAATGATTACTCATTCAITCGATATACACAAGGAC  
CCTTTACCAATTCAGTTTCAAGAAGCACTTTGTCAAGCAGCTAAACATGAAGGCCCTCTGCACAAATGTGACATCTCAAACCTACAGAAGCTGGACAGAAACTGTT  
CAATATGCTGAGGCTTGGAAAAATCAGAACCTGGACCCTAGCATTGGAAAAATGTTGAGGAGCAAAAGAACATGAATGTAAGGCCACTGTCTCAACTCTTTGAGCCCT  
TATTTACCTGGCTGAAAGACCAGAAACAAGAAATCTTTTGGGGATGGAGTACCAGCTGGATCCATATGCAGACCAAAAGCATCAAAGTGAAGGATAAGCCTAAATCA  
GCTCTTGGAGATAAAGCATATGAATGGAACGCAATGAAATGTACCTGTTCCGATCATCTGTTGCATATGCTATGAGGCGACTTTTTAAAGTAAAAAATCAGATG  
ATCTTTTTGGGGAGGAGATGTGCGAGTGGCTAATTTGAAACCAAGAATCTCTTTAATTTCTTTGTCACCTGACCTAAAAATGTGTCTGATATCATCTTAGAAGCTG  
AAGTTGAAAAGGCCAICAGGATGTCCGGAGCCGATCAATGAATGCTTTCCGCTCGAATGCAACAGCCCTAGAGTTCCTGGGGATACGCCCAACACTTGGACCTCT  
AACCAGCCCTGTTTCCATATGGCTGATTTGTTTGGAGTTGTGATGGGAGTGAATGTTGGCATTGTCACTCTGATCTCACTGGGATCAGAGATCGGAAGAAAG  
AAAAATAAAGCAAGAAGTGGAGAAAAATCCTTATGCCCTCCATCGATATTAGCAAAGGAGAAAAATAATCCAGGATTCAAAAACACTGATGATGTTCCAGACCTCTTT  
GGAAGCGGACTACTAACTTCAGCCTGCTGAAGCAGGCTGGAGACGTTGGAGGAGAACCTGGACCTATGGCTTTGAACTCAGGGTCAACCAGCTATTGGACCTTACTA  
TGAAAACCTAGCAAGGAATAGTGGATGACAGCGGATCCACAGCTTTATGAACTGAACAAAGTGGCCGCAATGCGATATCTATAAAAACTGTACCAGATGA  
TGCCGTGTTCTCAAAAGCAGTGGTTTCTTACGCTGTATAGCTCGTGGGGTCAACTTGAACCAAGCCCGAGCAGGATGTGGGGCGGCGAGGCGCTCCCGG  
GGCCCTGGCCTGGCAGGTCAGCTGACGCTCCAGAACGTCAGCTGGCTGGCAGGCTCCATATCACCCCGAGTGGATCGTGACAGCGCCCACTGGGATGAAAA  
ACCTCTAACAATCCATGGCATTGGACGGCATTGGGGGATTTGAGACAATCTTTCATGTTCTATGGAGCCGATACCAAGTAGAAAAAGTGATTCTCATCCAAA  
TTGACTCCAAGCAAGCAAAATGACATTCGCTGATGAAGCTGCAGAAGCTGACTTTAACAAGCACTAGTGAACCCAGTGTGTCTGCCAACCCAGGATGA  
TGCTGCAGCCAGAACAGCTCTGCTGGATTTCCGGGTGGGGGGCCACCGAGGAAAGGAAAGACTCAGAAAGTGTGAACCGCTGCCAAGGTGCTTCTCATTGAGAC  
ACAGAGCTCAACAGCAGATATGCTATGACAACCTGATCACACAGCCATGATCTGTGCCGGTCTCTGAGGGGAACGTCGATTCTTGGCAGGGTGGACAGTGGAG  
GGCCTCTGTCTACTTCAAGAACAATATCTGGTGGCTGATAGGGGATACAAGCTTGGGTTCTGGCTGTGCCAAAGCTTACAGACAGGAGTGTACGGGAATGTGATG  
GTATTCAGGACTGGATTTATCGACAATGAGGGCAGACGGCTCAAAAGGACTGTCATCTTCTGCTGATGTAATGCTAACTTCATAGTACACAAAATGAGAGTA  
TACACATGCTATTAGCTATCAAAAAGTATGATCTGTTCAAGTAAACCTGTGCCAAAGCATCAAGCTTGAAGTGGACATCTTCACTGACATTGCTTCAAGTATTTATCT  
GCCTAAGGATTTGACATCTCTCTGTTTATTAATAGAGATGTTTATCTTAGCATAAAAGAGGGAAATGTGCCCTTGGCCTCACAGCTATCCAGGGTATGATGTTGG

Additional note: Lower case letters in the beginning of hACE2 cDNA are the silent mutations introduced to prevent Cas9 re-cleavage.



**Model #16: ROSA26<sup>(ACTB-Lox-hACE2-P2A-tdT-Lox-EGFP)</sup>**

Notes:

- The purpose is to create a constitutive expression model for hACE2 with reporter capability.
- The design strategy is to insert a 'hACE2-P2A' cassette upstream of the tdTomato sequence by re-engineering the mTmG locus of mouse strain; <https://www.jax.org/strain/007576> Muzumdar et al. 2007, A global double-fluorescent Cre reporter mouse *Genesis*;45(9):593-605. doi: 10.1002/dvg.20335). The source of the mTmG cassette sequence is from the Addgene plasmid 17787 (<https://www.addgene.org/17787/sequences/>).

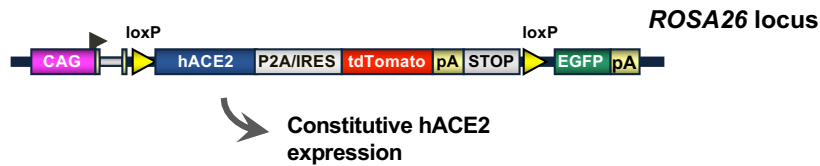

Sequence near the start codon of the mT region (ATG shown in uppercase) and the cleavage location of the chosen guide RNA is marked as '/':

tatacgaagttatattaaggggttccggatc/cATGggttgctgttttctccaagaccatg

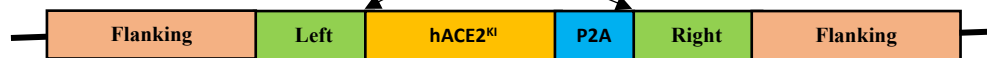

gRNA sequence: ATTAAGGGTTCGGATCCAT [GGG]. It cleaves 1bp upstream of the ATG.

Sequence of the ROSA26<sup>(ACTB-Lox-hACE2-P2A-tdT-Lox-EGFP)</sup>KI ssDNA:

```

GGCGCAGGGACTTCCTTTGTCCCAAATCTGTGCGGAGCCGAAATCTGGGAGGCGCCGCCGACCCCTCTAGCGGGCGCGGGGCGAAGCGGTGCGGC
GCCGGCAGGAAGGAAATGGGCGGGGAGGGCCCTTCGTGCGTCCGCGCGCCGCGCTCCCTTCTCCCTCTCCAGCCTCGGGGCTGTCGCGGGGGGACG
GCTGCCTTCGGGGGGACGGGGCAAGGGCGGGTTCGGCTTCTGGCGTGTGACCGGGCGCTCTAGAGCCTCTGCTAACCATGTTTCATGCCCTTCTCTTT
TTCTACAGCTCTGGCAACGTGCTGGTTATTGTGCTGTCTCATCATTTTGGCAAAGAATTGATTTGATACCAGCGGGCTCGACACTAGTGAACCTCTTC
GAGGGACCTAATAACTTCGTATAGCATACTATACGAAAGTTATATTAAGGGTTCGGGATCCATGCAAGCTCTCTCGGCTCTTCAGCCCTGTGTC
TGTAACCTGCTGCTCAGTCCACCAATTGAGGAACAGGCCAAGACATTTTGGACAAGTTTAAACCACGAAGCCGAAGACCTGTTCTATCAAAGTTCACCTGCT
TATATGAAGATGATGAGTGTGAAAATGAGATGGCAAGAACAAATCATTAGGAGACTATGGGGATTATTGGAGAGGAGACTATGAAGTAAATGGGG
TAGATGGCTATGACTACAGCCGCGCCAGTTGATGAAGATGTGGAACATACTTTGAAGAGATTAACCATTATATGAACATCTTCATGCCATGTGAG
GGCAAAGTTGATGAATGCCTATCCTTCTATATACAGTCCAATTTGGATGCCCTCCCTGCTCATTGTGCTTGGTATATGTGGGGTATGATTTGGACAAATCTG
TACTCTTTGACAGTTCCTTTGGACAGAAACCAACATAGATGTTACTGATGCAATGGTGGACAGGCCCTGGGATGCACAGAGAATATTCAAGGAGGCC
GAGAAGTTCTTTGATCTGTGGTCTTCCATAATGACTCAAGGATTCGGGAAAATCCATGCTAACGGACCCAGGAAATGTTCAAGAACAGTCTGCC
ATCCCACAGCTGGGACCTGGGGAAGGGGACTTCAGGATCCTATGTGCACAAAGGTGACAAATGGACGACTTCTGACAGCTCATCATGAGATGGGG
CATATCCAGTATGATATGGCATATGCTGCACAACTTTTCTGCTAAGAAATGGAGTAAATGAAGGATTCATGAAGCTGTGGGGAAATCATGTCACCTT
CTGCAGCCACACTAAGCATTAAATCCATTTGCTTCTGTACCCGATTTCAAGAAGACAATGAAACAGAAATAAATCTCTGCTCAAAACAAGCACT
CACGATTTGGGACTCTGCCATTTACTTACATGTTAGAGAAGTGGAGGTGGATGGTCTTTAAAGGGGAAATTCCAAAGACCCAGTGGATGAAAAAGTG
GTGGGAGATGAAGCGAGAGATAGTTGGGGTGGTGAACCTGTGCCCATGATGAAACATACTGTGACCCCGCATCTCTGTTCCATGTTTCTAATGATTA
CTATTTCATTCGATATTACACAAGGACCTTTACCAATTCAGTTTCAAGAAGCACTTTGTCAAGCAGCTAAACATGAAGGCCCTTGCACAAATGTGAC
ATCTCAAACCTACAGAAAGCTGGACAGAACTGTTCAATATGCTGAGGCTTGGAAAATCAGAACCCCTGGACCCATGCAATGGAAAATGTTGTAGGAGCA
AAGAACATGAATGTAAGGCCACTGCTCAACTACTTTGAGCCCTTATTACCTGGCTGAAAGACCAGAACAAAGAATTCCTTTGGGGATGGAGTACCAG
TGGAGTCCATATGCAGACCAAGCATCAAAGTGAGGATAAGCCTAAAATCAGCTCTTGGAGATAAAGCATATGAATGGAACGACAATGAAATGTACCTG
TTCCGATCATCTGTTGCATATGCTATGAGGCAGTACTTTTAAAGTAAATAATCAGATGATCTTTTGGGGAGGAGGATGTGCGAGTGGCTAATTTGA
AACCAAGAAATCTCCTTTAATTTCTTTGTCAGTGCACCTAAAATGTGCTGATATCATTCCTAGAAGTGAAGTGAAGGAGCCATCAGGATGTCCCGGAG
CCGATATCAATGATGCTTTCCGCTGGAATGACAAACAGCCCTAGAGTTTCTGGGATACAGCCAAACACTTGGACCTCCTAACCCAGCCCTTTCATATGG
CTGATTTGTTTTGGAGTTGTATGGGAGTATGTTGGTGGCATTGTGATCTCTGATCTTCACTGGGATCAGAGATCGGAAGAAGAAAAATAAAGCAAGA
AGTGGAGAAAAATCCTTATGCTCCTATCGATATTAGCAAAGGAGAAAAATAATCCAGGATTCAAAACACTGATGATGTTACAGACCTCCTTTGGAAAGCGGA
GCTACTAACTTCAGCCTGCTGAAGCAGGCTGGAGACGTGGAGAGAACCCCTGGACCTGGTTGCTGTTTTCTCCAAGACCATGGTGGAGCAAGGGAGAGGA
GGTCAATCAAGAGTTCAATGCGCTTCAAGGTGCGCATGGAGGGCTCATGAACCGGCCAGGATTCGAGATCGAGGGGCGAGGGGCGGAGCCCGCCCTACG
AGGGCACCAGACCCGCAAGTGAAGGTGACCAAGGGCGGCCCTTCCCTTCGCTGGGACATCCTGTCCCCCACTGATCATGCTGCTCAAGGGC
TACGTGAAGCACCCTCCGACATCCCGATTACAAGAAGCTGTCTTCCCGAGGGCTTCAAGTGGGAGCGCGTGAATGAACCTTCAGGACCGGGCTCT
GGTGACCTGACCCAGGACTCCTCCCTGCAGGACGGCACGCTGATCTACAAGGTGAAGATGCGCGGCACCAACTTCCCCCGACGGCCCGTAAATGC
AGAAGAAGACCATGGGCTGGGAGGCTCCACCGAGCGCTGTACCCCGCGACGGCC
    
```



**Model #17: ROSA26<sup>(ACTB-Lox-hACE2-IRES-tdT-Lox-EGFP)</sup>**

Notes: Same as model #16 except that IRES is used instead of P2A.

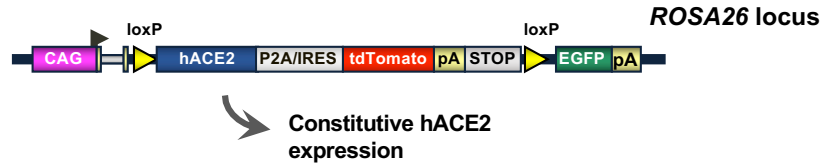

Sequence near the start codon of the mT region (ATG shown in uppercase) and the cleavage location of the chosen guide RNA is marked as '/':

tatacgaagttatattaagggttccggatc/cATGggttgctgttttctccaagaccatg

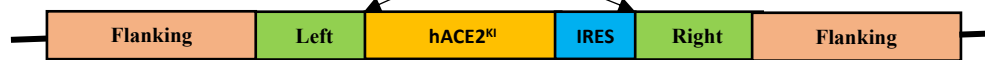

gRNA sequence: ATTAAGGGTTCGGATCCAT [GGG]. It cleaves 1bp upstream of the ATG.

Sequence of the ROSA26<sup>(ACTB-Lox-hACE2-IRES-tdT-Lox-EGFP)KI</sup> ssDNA:

```
GGCGCAGGGACTTCCTTTGTCCAAATCTGTGCGGAGCCGAAATCTGGGAGGCGCCGCCACCCCTCTAGCGGGCGCGGGGGC
AAGCGGTGCGGGCGCCGGCAGGAAGGAAATGGGCGGGGAGGGCCTTCGTGCGTCCGCCGCCGCCCTCCCTTCTCCCTCTCCAG
CCTCGGGGCTGTCCGCGGGGGACGGCTGCCTTCGGGGGGACGGGCGAGGGCGGGGTTCCGGCTTCTGGCGTGTGACCGGGCGG
TCTAGAGCCTCTGTAACCATGTTTCATGCCTTCTTTCTTTCTACAGCTCTGGGCAACGTGCTGGTTATTGTGCTGTCTCATCAT
TTTGGCAAAGAATTGATTTGATACCGGGGCTCGACACTAGTGAACCTTTCGAGGGACCTAATAACTTCGTATAGCATAACATTAT
ACGAAGTTATATTAAGGGTTCGGATCCATGTCAAGCTTTCCTGGCTCCTTCAGCCTTGTGTGCTGTAAGTCTGCTCAGTCCAC
CATTGAGGAACAGGCCAAGACATTTTGGACAAGTTTAAACCAGAACGCGAAGCCGAAAGACCTGTTCTATCAAAGTTCAGTCTTGG
ATTATAACACCAATATTACTGAAGAGAATGTCCAAAAATGAATAATGCTGGGGACAAATGGTCTGCCTTTTTAAAGGAACAGTCC
ACACTTGCCCAAATGTATCCACTACAAGAAATTCAGAATTCACAGTCAAGCTTCAGCTGCAGGCTTTCAGCAAATGGGCTTTC
AGTGTCTCAGAAGACAAGGCAACCGTTGAACACAATTTAAATACAATGAGCACCATCTACAGTACTGGAAAAGTTTGTAAACC
CAGATAATCCACAAGAAATGCTTACTTGAACCAAGTTTGAATGAAATAATGGCAAACAGTTAGACTACAATGAGAGGCTCTGG
GCTTGGGAAAGCTGGAGATCTGAGGTCGGCAAGCAGCTGAGGCCATTATATGAAGAGTATGTGGTCTTGAATAATGAGATGGCAA
GAGCAAATCATTATGAGGACTATGGGGATTATTGGAGAGGAGACTATGAAGTAAATGGGGTAGATGGTATGACTACAGCCGGCGG
CCAGTTGATTGAAGATGTGGAACATACCTTTGAAGAGATTAACCATATATGAACATCTTCATGCCTATGTGAGGGCAAAGTTGA
TGAATGCCTATCCTTCTATATCAGTCCAATTGGATGCCTCCCTGCTCATTGTGTTGGTATATGTGGGGTAGATTTTGGACAAATC
TGTACTCTTTGACAGTTCCTTTGGACAGAAACCAACATAGATGTTACTGATGCAATGGTGGACAGGCCCTGGGATGCACAGAGA
ATATTCAAGGAGGCCGAGAAGTCTTTGTATCTGTTGGTCTTCCTAATATGACTCAAGGATTTCTGGGAAAATTCATGTAAACGGA
CCCAGAAATGTTTCAGAAAGCAGTCTGCCATCCCACAGCTTGGGAGCTGGGGAAGGGCGACTTCAGGATCCTTATGTGCACAAAG
GTGACAAATGGACGACTTCTGACAGCTCATCATGAGATGGGGCATATCCAGTATGATGGCATATGCTGCACAACCTTTTCTGCT
AAGAAATGGAGCTAATGAAGGATTCATGAAGCTGTTGGGGAATCATGTCACTTTCTGCAGCCACACCTAAGCATTAAATCCA
TTGGTCTTCTGTCACCCGATTTCAAGAAGACAATGAACAGAAATAAATTCCTGCTCAAACAAGCACTCAGGATTTGGGACTC
TGCCATTTACTATGTTAGAGAAGTGGAGGTGGTGTCTTTAAAGGGGAAATCCCAAAGACCAGTGGATGAAAAAGTGGTGG
GAGATGAAGCGAGAGATAGTTGGGGTGGTGAACCTGTGCCCATGATGAAACATACTGTGACCCCGCATCTCTGTTCCATGTTTC
TAATGATTAATCATTTCGATATTACACAAGGACCCTTACCAATTCAGTTCGAAGAAGCACTTTGTCAAGCAGCTAAACATGA
AGGCCCTTGCACAAATGTGACATCTCAAACCTCAAGACTTGCAGAACTGGACAGAAACTGTTCAATATGCTGAGGCTTGGAAATCAGAAC
CCTGGACCCTAGCATTGGAAAATGTTGTAGGAGCAAAGAACATGAATGTAAGGCCACTGCTCAACTACTTTGAGCCCTTATTTACC
TGGTGAAAAGACCAGAACAGAATCTTTTGTGGGATGGAGTACCGACTGGAGTCCATATGCAGACCAAAGCATCAAAGTGAGGA
TAAGCCTAAAATCAGCTCTTGGAGATAAAGCATATGAATGGAACGACAATGAAATGTACCTGTTCCGATCATCTGTTGCATATGCT
ATGAGGCAGTACTTTTTAAAAGTAAAAAATCAGATGATTCCTTTTGGGGAGGAGGATGTGCGAGTGGCTAATTTGAAACCAAGAAT
CTCCTTTAATTTCTTTGTCACTGCACCTAAAAATGTGTCTGATATCATTCCTAGAACTGAAGTTGAAAAGGCCATCAGGATGTCCCG
GAGCCGATCAATGATGCTTCCGCTGAATGACAACAGCCTAGAGTTTCTGGGGATACAGCCAACACTTGGACCTCCTAACCAGC
CCCCGTTTCCATATGGCTGATTGTTTTGGAGTTGTATGGGAGTGATAGTGGTGGCATTGTCATCCTGATCTTCACTGGGATCA
GAGATCGGAAGAAGAAAAATAAAGCAAGAAGTGGAGAAAAATCCTTATGCCTCCATCGATATTAGCAAAGGAGAAAAATAATCCAGG
ATTCCAAAACACTGATGATGTTCAAGACTCCTTTAGCCCCCTCCTCCCTCCCCCCCCCTAACGTTACTGGCCGAAGCCGCTTGGAA
AAGCCGGTGTGCGTTTGTCTATATGTTATTTCCACCATATTGCCGCTCTTTGGCAATGTGAGGGCCCGGAAACCTGGCCCTGTC
TCTGTGACGAGCATTCTAGGGGCTTTCCCTCTCGCCAAAGGAATGCAAGGCTGTTGAATGTCGTGAAGGAAGCAGTTCCTCT
GGAAGCTTCTTGAAGACAACAACGCTGTGAGCGACCTTTGCAGGCAGCGGAACCCCCACCTGGCGACAGGTGCTCTGCGGC
CAAAAGCCACGTGATAAGATACACCTGCAAAGCGGCACAACCCCACTGCGCCAGTGTGAGTGGATAGTGTGGAAAGATCA
AATGGCTTCTCCTAAGGATTCAACAAGGGGCTGAAGGATCCCCAGAAAGTACCCATTGTATGGGATGTGATGGGCTTCG
GTGCACATGCTTACATGTGTTAGTCAGGTTAAAAAACGCTAGGCCCCCCGAACCAGGGGACGTGGTTTTCTTTGAAAAA
CACGATGATAAGGTTGCTGTTTCCAAAGACCATGGTGAAGGAGGAGGAGGTCATCAAAGAGTTTATCGGCTTCAAGGTCCG
CATGGAGGGCTCCATGAACGGCCAGTTCGAGATCGAGGGCGAGGGCGAGGGCCGCCCTACGAGGGCACCCAGACGGCCAA
GCTGAAGGTGACAAAGGGCGCCCTGCTGCTGCGCTGGGACATCTGCTCCCGCAGTTCATGTACGGCTCAAAGGCGTACGTG
AAGCACCCTGCGACATCCCGATTACAAGAAGCTGCTCTCCCGAGGGCTTCAAGTGGGAGCGCGTGATGAACTTCGAGGACG
GCGGTCTGGTGACCGTGACCCAGGACTCCTCCTGCAAGGACGGCACGCTGATCTACAAGGTGAAGATGCGCGGCACCAACTCC
CCCCAGCGCCCGTAATGCAGAAGAAGACATGGGCTGGGAGGCTCCACCGAGCGCTGTACCCCGCGACGGCG
```

**Model #18: ROSA26<sup>(ACTB-Lox-tdT-Lox-hACE2-P2A-EGFP)</sup>**

Notes:

- The purpose is to create a CRE-activatable expression model for hACE2 with reporter capability.
- The design strategy is to insert a 'hACE2-P2A' cassette upstream of the EGFP sequence by re-engineering the mTmG locus of the mouse strain; <https://www.jax.org/strain/007576> (Muzumdar et al. 2007, A global double-fluorescent Cre reporter mouse *Genesis*;45(9):593-605. doi: 10.1002/dvg.20335). The source of the mTmG cassette sequence was from the Addgene plasmid 17787 (<https://www.addgene.org/17787/sequences/>).

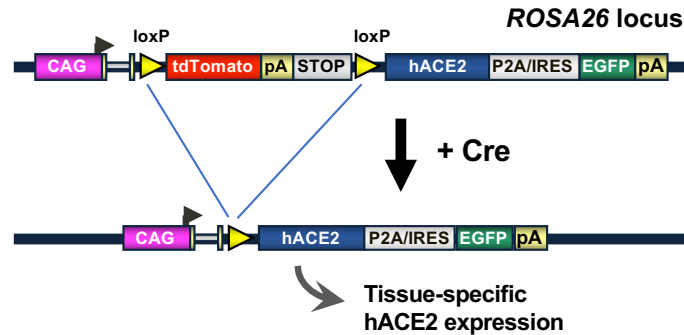

Sequence near the start codon of the mG region (ATG shown in uppercase) and the cleavage location of the chosen guide RNA is marked as '/':

**ttaagggttccggatcatcaccgcg/ATGggttgctgtttctccaagaccgcagcg**

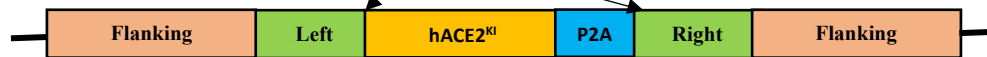

gRNA sequence: GAGAAACAGCAACCCATCCG [CGG]. It cleaves immediately upstream of the ATG sequence of the ROSA26<sup>(ACTB-Lox-tdT-Lox-hACE2-P2A-EGFP)<sup>KI</sup></sup> ssDNA donor.

```
GGTTTGTCCAAACTCATCAATGTATCTTATCATGTCTGGATCTGACATGGTAAGTAAAGCTTGGGCTGCAGGTCGAGGGACCTAATAAAGTTCGTATAGCATACTTATA
CGAAGTATATTAAGGGTTCGGGATCACCAGCGGATGTC AAGCTCTTCTGGTCTCTCTCAGCCTTGTGCTGTAAGTCTGCTCAGTCCACCATTGAGGAAACAG
GCCAAGACATTTTGGACAAGTTAAACCAGGAAGCCGAAGACCTGTTCTATCAAAGTTCACITGCTTCTTGGAAATTATAACACCAATATTAAGTGAAGAGAATGTCCAA
AACATGAATAATGCTGGGGACAAATGGTCTGCCITTTTAAAGGAACAGTCCACACTTGCCTAAATGTATCCACTACAAGAAATTCAGAAATCTCAGAGTCAAGCTTCAG
CTGCAGGCTCTTCAGCAAAATGGGTCTTCAGTGTCTCAGAAAGCAAGAGCAAAACGGTTGAACACAATTTCAAATACAATGAGCACCATCTACAGTACTGGAAAAGTT
TGTAACCCAGATAATCCACAAGAATGCTTATTACTTGAACCAAGTTTGAATGAAAATAATGGCAAAACAGTTTAGACTACAATGAGAGGCTCTGGGCTTGGGAAAAGCTGG
AGATCTGAGGTCGGCAAGCAGCTGAGGCCATTATATGAAGAGTATGTGGTCTTGAAGAAATGAGATGGCAAGAGCAAAATCATTATGAGGACTATGGGGATTATTGGAG
AGGAGACTATGAAGTAAATGGGGTAGATGGCTATGACTACAGCCGGCCAGTTGATTGAAGATGGGAACATACCTTTGAAGAGATTAACCAATTATATGAACATC
TTATGCTTATGTGAGGGCAAGTTGATGAATGCCTATCCTTCTATATCATGCTCAAATTTGGATGCCTCCCTGCTCAATTTGCTTTGGTGTATGTGGGGTAGATTTTGA
CAAATCTGACTCTTTGACAGTTCCCTTTGGACAGAAACCAACATAGATGTTACTGATGCAATGGTGGACAGGCCCTGGGATGCACAGAGAAATTTCAAGGAGGCC
GAGAAGTCTTTGTATCTGTTGGTCTTCTTAATATGACTCAAGGATTTCTGGAAAATTTCCATGCTAACGGACCCAGGAAATGTTCAAGAAAGCAGTCTGCCATCCACA
GCTTGGGACCTGGGAAAGGGGACTTCAGGATCCTTATGTGCACAAAGTGACAAATGGACGACTTCTGACAGCTCATATGAGATGGGGCATATCCAGTATGATAT
GGCATATGCTGCACAACCTTTTCTGCTAAGAAATGGAGCTAATGAAGGATTCATGAAGCTGTTGGGAAATCATGTCACTTTCTGCAGCCACACCTAAGCAATTTAAA
ATCCATTGGTCTTCTGTCAACCCGATTTTCAAGAAAGACAATGAAACAGAAATAAACTTCTGCTCAAACAGCACTCACGATTGTTGGGACTCTGCCATTTACTTACATG
TTAGAGAAAGTGGAGGTGGATGGTCTTTAAAGGGGAAATTTCCAAAGACCAGTGGATGAAAAGTGGTGGGAGATGAAAGCAGAGATAGTTGGGGTGGTGGAACTG
TGCCCATGATGAACACTACTGTGACCCCGCATCTCTGTTCCATGTTTCTAATGATTAATCAATTCGATATACACAAGGACCCCTTACCAATTCAGITTTCAAGA
AGCAGCTTTGCAAGCAGCTAAACATGAAGGCCCTCTGCACAAATGTGACATCTCAAACCTACAGAAAGCTGGACAGAAACTGTTCAATATGCTGAGGCTTGGAAAATC
AGAACCCTGGACCTAGCATTTGAAAATGTTGTAGGAGCAAAGAATGAATGTAAGGCCACTGCTCAACTACTTTGAGCCCTTATTTACTGGCTGAAAAGCCAGA
ACAAGAAATCTTTTGGGATGGAGTACCGACTGGAGTCCATATGCAGACCAAGCAATCAAAGTGAAGGATAAGCCTAAAATCAGCTCTTGGAGATAAAGCATATGAA
TGGAACGACAAATGAAATGTACCTGTTCCGATCATCTGTGATATGCTATGAGGCAGTACTTTTAAAAGTAAAATAATCAGATGATTTCTTTGGGGAGGAGGATGTG
CGAGTGGCTAATTTGAAACCAAGAAATCTCCTTTAATTTCTTTGTCACTGCACCTAAAATGTGTCTGATATCATTCTAGAACTGAAGTTGAAAAGGCCATCAGGATGT
CCCGAGCCGTATCAATGATGCTTCCGCTGGAATGACAACAGCCTAGAGTTTCTGGGGATACAGCCAACTTGGACCTCTAACAGCCCTCTTTCCATATGCC
TGATTTGTTTGGAGTTGTGATGGGAGTGATAGTGGTGGCATTCCTGATCTTCACTGGGATCAGAGATCGGAAGAAGAAAATAAAGCAAGAAAGTGGAGAA
AATCCTTATGCCTCCATCGATATTAGCAAAGGAGAAAATAATCCAGGATTTCCAAAACACTGATGATGTTTCAGACCTTTTGGAAAGCGGAGCTACTACTTCAGCCTG
CTGAGCAGGCTGGAGACGTGGAGGAGAACCCTGGACCTATGGGTTGCTGTTTCTCCAAGACCCGACGGAAGGGAGAAGCCGCCGGGAGAGGCTGGGGAGGCG
GCTGTGGCTCTGCTCCAAAGCGAACGGACAGGAGAATGGCCACGTGAAGGTAGGATCCGTGAGCAAGGGCGAG
```

**Model #19: ROSA26<sup>(ACTB-Lox-tdT-Lox-hACE2-IRES-EGFP)</sup>**

Notes: Same as model #18 except that IRES is used instead of P2A.

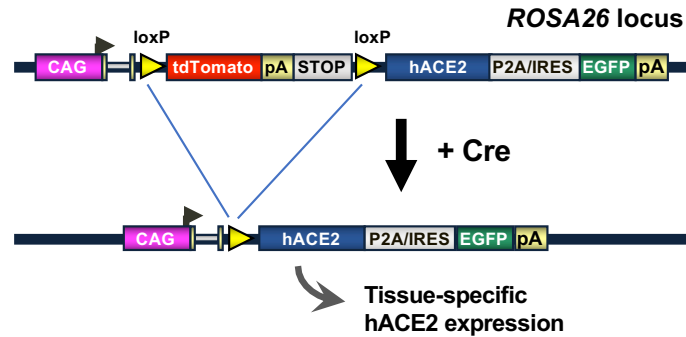

Sequence near the start codon of the mG region (ATG shown in uppercase) and the cleavage location of the chosen guide RNA is marked as '/':

ttaagggttccggatcatcaccgcg/ATGggttgctgtttctccaagaccgcagcg

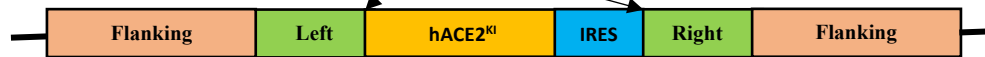

gRNA sequence: GAGAAACAGCAACCCATCCG [CGG]. It cleaves immediately upstream of the ATG

Sequence of the ROSA26<sup>(ACTB-Lox-tdT-Lox-hACE2-IRES-EGFP)KI</sup> ssDNA:

```
GGTTGTCCAAACTCATCAATGTATCTTATCATGTCTGGATCTGACATGGTAAGTAAAGCTTGGGCTGCAGGTCGAGGGACCTAATA
ACTTCGTATAGCATAACATTATAACGAAGTTATATTAAGGGTTCGGGATCATCACCCGGATGTCAAGCTCTTCTGGCTCCTTCTCAG
CCTTGTGCTGTAAGTCTGCTCAGTCCACCATTGAGGAACAGGCCAAGACATTTTGGACAAGTTAAACCACGAAGCCGAAGACC
TGTTCTATCAAAGTTCACCTTGGCTTCTTGGAAATATAACACCAATATTACTGAAGAGAATGTCCAAAACATGAATAATGCTGGGGACA
AATGGTCTGCCTTTTAAAGGAACAGTCCACACTTGCCCAAATGTATCCACTACAAGAAAATTCAGAATCTCACAGTCAAGCTTCAGC
TGCAGGCTCTTCAGCAAAATGGGCTCTCAGTGTCTCAGAAGACAAGAGCAAACCGTTGAACA CAATTCTAATAACAATGAGCACC
ATCTACAGTACTGGAAAAAGTTGTAACCCAGATAATCCACAAGAAATGCTTACTTGAACCAGGTTTGAATGAAATAATGGCAAAAC
AGTTAGACTACAATGAGAGGCTCTGGGCTTGGGAAAGCTGGAGATCTGAGGTCTGAGGTCGGCAAGCAGCTGAGGCCATTTATGAAGT
ATGTGGTCTTGA AAAATGAGATGGCAAAGACAAATCATTATGAGGACTATGGGGATTATTGGAGAGGAGACTATGAAGTAAATGG
GGTAGATGGCTATGACTACAGCCCGCGCCAGTTGATTGAAGATGTGGAACATACCTTTGAAGAGATTAAACCATTATATGAACATC
TTCATGCCTATGTGAGGGCAAAGTTGATGAATGCCTATCCTTCCTATATCAGTCCAATGGATGCCTCCCTGCTCATTGTGCTTGGTG
ATATGTGGGGTAGATTTTGGACAAATCTGTACTCTTGGACAGTTCCCTTTGGACAGAAAACCAACATAGATGTTACTGATGCAATG
GTGGACCAGGCTGGGATGCACAGAGAATATTCAAGGAGGCCGAGAAGTCTTTGTATCTGTTGGTCTTCTAATATGACTCAAGG
ATCTGGGAAAATTCATGCTAACGGACCCAGGAAATGTTAGAAAGCAGTCTGCCATCCACAGCTTGGGACCTGGGGAAAGGGC
GACTCAGGACTCCTATGTGCACAAAGGTGACAATGGACGACTCCTCAGCAGTCTCATATGAGATGGGGATATCCAGATGAT
GGCATATGCTGCACAACCTTTTCTGCTAAGAAAATGGAGCTAATGAAGATTCCATGAAGCTGTTGGGAAAATCATGTCACTTTCTG
CAGCCACACCTAAGCATTTAAAATCCATTGGTCTTCTGTCAACCCGATTTTCAAGAAGACAATGAAACAGAAAATAAACTTCTGCTCA
AACAAGCACTACGATTGTTGGGACTCTGCCATTTACTTACATGTTAGAGAAGTGGAGGTGGATGGTCTTTAAAGGGGAAAATCCC
AAAGACCAGTGGATGAAAAAGTGGTGGGAGATGAAGCGAGAGATAGTTGGGGTGGTGAACCTGTGCCCATGATGAAACATACT
GTGACCCCGCATCTCTGTTCCATGTTTCTAATGATTACTCATTTCATTCGATATTACACAAGGACCCCTTACCAATTCCAGTTTCAAG
AAGCACTTTGTCAAGCAGCTAAACATGAAGGCCCTCTGCACAAATGTGACATCTCAAACCTCTACAGAAGCTGGACAGAAAATGTTT
AATATGCTGAGGCTTGGAAAATCAGAACCCTGGACCCTAGCATTTGGAAAATGTTGTAGGAGCAAAGAACATGAATGTAAGGCCACT
GCTCAACTACTTTGAGCCCTTATTTACCTGGCTGAAAGACCCAGAAACAAGAATTCCTTTTGTGGGATGGAGTACCGACTGGAGTCCAT
ATGCAGACCAAAGCATCAAAGTGAGGATAAGCCATAAATCAGCTCTTGGAGATAAAGCATATGAATGGAACGACAATGAAATGTAC
CTGTTCCGATCATCTGTTGCATATGCTATGAGGCACTTTTTTAAAGTAAAAAATCAGATGATTCTTTTTGGGGAGGAGGATGTG
CGAGTGGCTAATTTGAAACCAAGAATCTCCTTAAATTTCTTGTCACTGCACCTAAAAATGTGTCTGATATCATTCTTGAACIGAA
GTTGAAAAGGCCATCAGGATGTCCCGGAGCCGATCAATGATGCTTTCGCTGTAATGACAACAGCCTAGAGTTTCTGGGGATACA
GCCAACACTTGGACCTCCTAACCAGCCCCCTGTTCCATATGGCTGATTGTTTTGGAGTTGTGATGGGAGTGATAGGTTGGCA
TTGTCATCTGATCTTCACTGGGATCAGAGATCGGAAGAAGAAAATAAAGCAAGAAGTGGAGAAAATCCTTATGCCTCCATCGAT
ATTAGCAAAGGAGAAAATAATCCAGGATTCAAAACCTGATGATGTTTTCAGACCTCCTTTTAGCCCCTCCCTCCCTCCCTCCCTAA
CGTACTGGCCGAAGCCGTTGGAATAAGGCCGGTGTGCGTTTGTCTATATGTTATTTCCACCATATTGCCGCTTTTGGCAATGT
GAGGCGCCGGAAAACCTGGCCCTGTCTTCTGACGAGCATCTTACAGGGCTTTCCCTCTCGCCAAAGGAATGCAAGGTCTGTTGA
ATGTCGTGAAGGAAGCAGTCTCTGGAAGCTTCTGGAAGCTTCTGAAGACAACAACAGTCTGTAGCGACCTTTGCAGGCAGCAACCCCA
CCTGGCGACAGGTGCCTCTGCGGCCAAAAGCCACGTGTATAAGATACACCTGCAAAGGCGGCACAACCCAGTGCACGTTGTGA
GTTGGATAGTTGTTGAAAAGAGTCAAATGGCTCTCCTCAAGCTTTTCAACAGGTGTTAAAGGGGCTGAAGGATGCCAGAGGTACCCCATG
ATGGGATCTGATCTGGGGCTCGGTGCACATGCTTTACATGTGTTTGTAGTTCAGGTTAAAAAACGTTCTAGGCCCCCGAACCCG
GGACGTGTTTTCTTTGAAAACACGATGATAAATGGGTTGCTGTTTTCTCCAAAGCCGAGCGAAGGGAGAAGCCGCGCGGAG
AGGCCTGGGAGGCGGCTGTGGCTCGTCCCTTCAAAGCGAACGGACAGGAGAATGGCCACGTGAAGGTAGGATCCGTGAGC
AAGGGCGAG
```



**Model #21: Ai63-TIGRE-TRE-hACE2-IRES-tdT**

Notes:

- a. The purpose is to create a tetracycline inducible model for hACE2 expression with reporter capability.
- b. The design strategy is to insert an ‘hACE2-IRES’ cassette upstream of the tdT sequence by re-engineering the TIGRE locus described in Daigle, T. L. et al., Cell 174, 465-480.e22 (2018).

The Ai63 mouse contains a TRE promoter followed by Lox-Stop-Lox cassette and tdT. The Lox-Stop-Lox cassette (1190kb region) will be excised using two guide RNAs to insert the hACE2-P2A cassette. The sequence source (for guide search) was from the Addgene plasmid 61576

<https://www.addgene.org/61576/>. The sequences used for guide search are as follows: Same as model #20 except that IRES is used instead of P2A

Sequence near the insertion site (the cleavage location expected for the chosen guide RNA is marked as ‘/’).

ctatt/taaatataacttcgtatagcata::::::::::tatacgaagttatcacgcgt/gtttgggac

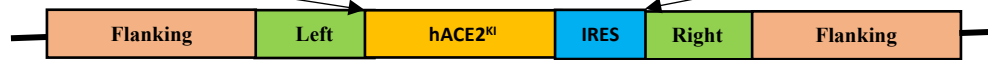

Left gRNA Sequence- ATACGAAGTTATATTTAAAT [AGG]

Right gRNA Sequence - ACGAAGTTATCACGCGTGTT [TGG]

Sequence of the Ai63-TIGRE-TRE-hACE2-IRES-tdT ssDNA:

GTTTACTCCCTATCAGTGATAGAGAACGTTATGTCGAGTTTACTCCCTATCAGTGATAGAGAACGTTATGTCGAGTTTACTCCCTATCA  
 GTGATAGAGAACGTTATGTCGAGTTTACTCCCTATCAGTGATAGAGAACGTTATGTCGAGTTTACTCCCTATCAGTGATAGAGAACGTTA  
 TGTCGAGGTAGGGCGTGTACGGTGGGAGGCCATATAAGCAGAGCTCGTTTGTGAAACCGTCAGATCGCCTATCCACCATGTCAAG  
 CTCTTCTGGCTCCTTCTCAGCCCTTGTGCTGTAACCTGCTGCTCAGTCCACCATTGAGGAACAGGCCAAGACATTTTGGCAAAAGT  
 TAACCACGAAGCCGAAGACCTGTTCTATCAAAGTTCACTTGCTTCTTGGAAATTATAACACCAATATTACTGAAAGAGAATGTCCAAAA  
 CATGAATAATGCTGGGACAAAATGGTCTGCCTTTTTAAAGGAACAGTCCACACTTGCCAAATGTATCCACTACAAGAAATTCAGA  
 ATCTCACAGTCAAGCTTCAGCTGCAGGCTCTTCAGCAAAATGGGTCTTCAGTGTCTCAGAAGACAAGAGCAAAACGGTTGAACACA  
 ATTTAAATACAATGAGCACCCTACAGTACTGGAAGGTTTGAACCCAGATAATCCACAAGAATGCTTATTACTTTGAACAGGT  
 TTGAATGAAATAATGGCAAAACAGTTTACTACTACAATGAGAGGCTCTGGGCTTGGGAAAGCTGGAGATCTGAGGTGGCAAGCAGC  
 TGAGGCCATTATATGAAGAGTATGTGGTCTTGGAAATGAGATGGCAAGAGCAAAATCATTATGAGGACTATGGGGATTATGGAGA  
 GGAGACTATGAAGTAAATGGGGTAGATGGCTATGACTACAGCCGCGCCAGTTGATTGAAGATGTGGAACATACCTTTGAAGAGA  
 TTAACCATTTATGAACATCTTCAACCTATGTGAGGGCAAAGTTGATGAATGCCTATCCCTCCTATACAGTCCAAATGGATGCC  
 TCCCTGCTCATTGCTTGGTGATATGTGGGGTAGATTTGGACAAATCTGTACTCTTTGACAGTTCCTTTGGACAGAAACCAAAACA  
 TAGATGTTACTGATGCAATGGTGGACCAGGCCTGGGATGCACAGAGAATATTCAAGGAGGGCCGAGAAGTCTTTGTATCTGTTGGT  
 CTTCCTAATATGACTCAAGGATCTGGGAAAATTCATGCTAACCGAACCCAGGAAATGTTCCAGAAAGCAGTCTGCCATCCCACAGC  
 TTGGGACCTGGGGAAGGGCAGCTTCAGGATCCTTATGTGCACAAAGGTGCACAAATGGACGACTCTCTGACAGCTCATCATGAGATG  
 GGGCATATCCAGTATGATATGGCATATGCTGCACAACCTTTTCTGCTAAGAAATGGAGCTAATGAAGGATTCCATGAAGCTGTTGG  
 GAAAATCATGTCATTTCTGCAGCCACACCTAAGCATTAAAAATCCATTGGTCTTCTGTCAACCCGATTTTCAAGAAGACAATGAAAC  
 AGAAATAAACTCTGCTCAACCAAGCACTCAGATTTGTTGGGACTCTGCACTTACATGTTAGAGAAGTGGAGGTGGATGG  
 TCTTTAAAGGGGAAATTTCCAAAGACCAGTGGATGAAAAAGTGGTGGGAGATGAAGCGAGAGATAGTTGGGGTGGTGGAAACCTGT  
 GCCCATGATGAAACATACTGTGACCCCGCATCTCTGTTCCATGTTCTAATGATTACTCATTTCATTCGATATTACACAAGGACCCT  
 TTACCAATTCAGTTTCAAGAAGCACTTTGTCAAGCAGCTAAACATGAAGGCCCTCTGCACAAATGTGACATCTCAAACTTACAGA  
 AGCTGGACAGAAAAGTTCATATGCTGAGGCTTGGAAAATCAGAACCCTGGACCCTAGCATTGGAAAAATGTTGTAGGAGCAAAAGA  
 ACATGAATGTAAGGCCACTGCTCAACTACTTTGAGCCCTATTACCTGGCTGAAAGACCAGAACAGAATCTTTTGTGGGATGG  
 AGTACCAGTGGAGTCCATATGCAGACCAAAAGCATCAAAGTGAAGATAAGCCTAAAATCAGCTCTTGGAGATAAAGCATATGAATG  
 GAACGACAATGAAATGTACCTGTTCCGATCATCTGTGTCATATGCTATGAGGCACTTTTAAAAAGTAAAAAATCAGATGATTCT  
 TTTTGGGGAGGAGGATGTGCGAGTGGCTAATTTGAAACCAAGAATCTCCTTTAATTTCTTTGTCACTGCACCTAAAAATGTGTCTGA  
 TATCATTCTAGAACTGAAGTTGAAAAGGCCATCAGGATGTCCCGGAGCCGATCAATGATGCTTTCCGCTGTAATGACAACAGCC  
 TAGAGTTTCTGGGGATACAGCCAACACTTGGACCTCCTAACAGCCCTGTTTCCATATGGCTGATTGTTTTTGGAGTTGTGATG  
 GGAGTGATAGTGGTTGGCATTGTCATCTCTGATCTTCACTGGGATCAGAGATCGGAAGAAGAAAAATAAGCAAGAAGTGGAGAAA  
 ATCCTTATGCCTCCATCGATATTAGCAAAGGAGAAAAATAATCCAGGATTCAAAAACACTGATGATGTTCCAGACCTCCTTTAGCCCC  
 TCTCCCTCCCCCCCCCTAAGTACTGGCCGAAGCCGCTTGGAAATAAGGCCGGTGTGCGTGTGCTATATGTTATTTCCACATA  
 TTGCCGCTTTTGGCAATGTGAGGGCCGGAAACCTGGCCCTGTCTTTGACGAGCATTCCTAGGGGTTTCCCTCTCGCCAA  
 AGGAAATGCAAGGCTGTTGAAATGTCGTGAAAGGAAGCAGTTCCTCTGGAAGCTTCTGAAAGACAAACAACGTTCTGTAGCGACCCTTT  
 GCAGGCAGCGGAACCCCTGCGGACAGGTGCCTCTGCGGCCAAAAGCCAGCTGTATAAGATACACCTGCAAAGGGCGGCACA  
 ACCCCAGTGCACGTTGTGAGTTGGATAGTTGTGAAAAGAGTCAAATGGCTCTCTCAAGCGTATTCAACAAGGGGCTGAAGGAT  
 GCCCAGAAGTACCCCATTTGATGGGATCTGATCTGAGGCTCGGTCACATGCTTTTACATGTGTTAGTCGAGGTTAAAAAACC  
 TCTAGGCCCCCGAACCCAGGGGACGTGGTTTTCTTTGAAAACACGATGATAAGTTTGGGACGCGTGTAGCGCCACCATGGT  
 GAGGACGGCGGAGGAGGTCATCAAAGAGTTCATGCGCTTCAAGGTGCGCATGGAGGGCTCCATGAACGGCCACGAGTTCGAGATC  
 GAGGCGAGGGCGAGGGCCCTACGAGGGCCACCCAGCCGCAAGCTGAAGGTGACCAAGGGCGCCCTGCCCTCCCTCGCC  
 TGGACATCTGCTCCCGAGTTCATGTACGGCTCAAAGCGTACGTGAAGCAGCCCGGACATCCCGGATTACAAGAAGCTGTC  
 CTCCCGAGGGCTTCAAGTGGGAGCGCGTATGAACTTCGAGGACGGCGTCTGGTGACCGTGACCCAGGACTCCTCCTGCAG  
 GACGGC

**Models #22, #23 and #24**

- 22) *B6.mAce2<sup>CKO</sup>-hACE2<sup>CKI</sup>*
- 23) *NSG.mAce2<sup>CKO</sup>-hACE2<sup>CKI</sup>*
- 24) *BALB/c.mAce2<sup>CKO</sup>-hACE2<sup>CKI</sup>*

**Notes:**

- a. The purpose is to create a conditional knock-in (cKI) model for hACE2.
- b. The cKI cassette is a modified version of the XTR strategy described in Camila et al., 2015 (Nat Commun. 5;6:8783.doi: 10.1038/ncomms9783). The source of the XTR cassette was from the Addgene plasmid <https://www.addgene.org/browse/article/16271/>
- c. Exon 1 of *mAce2* is a non-coding exon. The cKI cassette is inserted at 310 bp upstream of the beginning of exon 2 (the first coding exon). The sequence used for gRNA search was from [https://uswest.ensembl.org/Mus\\_musculus/Transcript/Exons?db=core;g=ENSMUSG0000001540;5;r=X:164139332-164188420;t=ENSMUST00000112271](https://uswest.ensembl.org/Mus_musculus/Transcript/Exons?db=core;g=ENSMUSG0000001540;5;r=X:164139332-164188420;t=ENSMUST00000112271).

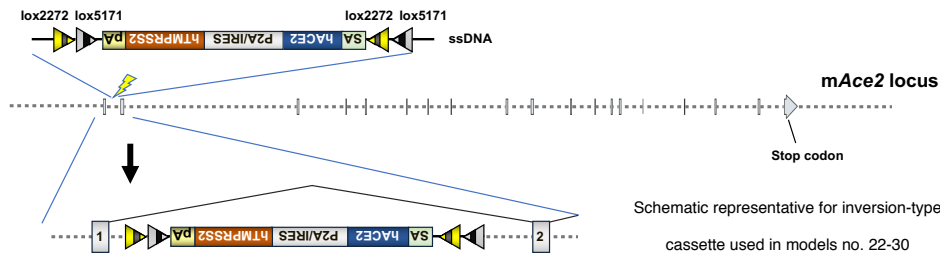

Sequence near the insertion site (the cleavage location expected for the chosen guide RNA is marked as ‘/’).

**aggctataagttccaatatgtgtcccatg/atttctaagtctagccctttctgttatagta**

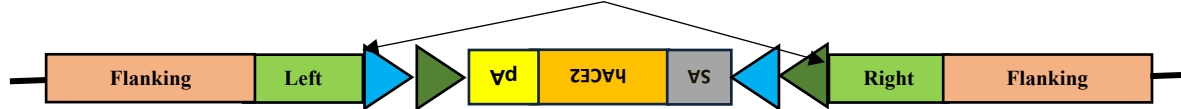

The gRNA sequence (in the intron 1) is GGGCTAGACTTAGAAATCAT [GGG]

Sequence of the *mAce2<sup>CKO</sup>-hACE2<sup>CKI</sup>* ssDNA:

```

AGCTCTAGCTGCTTTGATTGGTAGACAAAGCTGTCTCAAACTCAGAGACTTCTCTTCTTGTCTCTGAGTGTGGGATTAAGGCATGGACCACCCTGCCCTG
CCCCATTCTCCATTAATTTTAAAGTGAATGCTTGCAAAAGCTCACTTCTTTGGTGAACAGCTTCTTTACAAAATAAGTACCTTTGGCTTCGTTTTATAGGATTCCTAA
AAAGAAAAAAGATTCCAGCCAGGTGGTGTGGTGCACACCTTAAATCCCAGCAGTCAGGAGGCCAGAGGAAAGCAGATCTCTTGAGTTTGGGCTAGCCTAGTCTAC
AGAGGGAGTTCCAGGCACAGCCAGGCTACAGAGAGGAAGTGTCTTAAACACCAAGAAAAGAGAGAAAGGAGAGAGGGAGGGATGGATAGCTTATTGATAGAATTG
TCAGAAAAGGCTATAAGTTCCAATATGTGCCATGATAACTTCGTATAGGATACCTTATACGAAGTTATCTCAGCTAGAAGCCATAACTTCGTATAGTACACATTTA
CGAAGTTATGTTTATCGAATTCCTGCAGCCCGGTAGATCTTTACAATTTACGGCTTAAAGATACATTGATGAGTTTGGACAAACCACAACCTAGAATGCAGTGAAAAAATGCG
TTTATTGTTGAATTTGATGCTATGCTTTATTGTAACTTATAAGCTGCAATAAACAAGTTAACAACAACAATTGCATTCATTTATGTTTCAGGTTCCAGGGGAGG
TGTGGGAGGTTTTTAAAGCAAGTAAACCTCTACAATATGGTATGGCTGATATGATCAGTTATCTAGATCCGGTGGATCCCTAAAAGGAGGCTTGAACATCATCAGTGT
TTGGAATCCGGATTAATTTCTCTTTGGCTAATATCGATGGAGGCATAAGGATTTCTCCACTTCTGCTTTATTTCTTCTCCGATCTCTGATCCCAGTGAAGATCA
GGATGACAATGCCAACCACTATCACTCCCATCACAACCTCCAAAAACAATCAGCCATATGGAAACAGGGGGCTGGTTAGGAGGTCGAAGTGTGGCTGTATCCCCAGA
AACTCAGGCTGTGTGTCATTCAGACGGAAAGCATCAITGATACGGCTCCGGGACATCTGATGGCTTTTCAACTTCAGTCTAGGAAATGATATCAGACACATTTTAA
GGTGCAGTGACAAAGAAATTAAGGAGATTTCTGGTTTCAAATAGCCATCGCATCTCCTCCCAAAAAGAAATCATCTGATTTTACITTTAAAAGTACTGCC
TCATAGCATATGCAACAGATGATCGGAAACAGGTACATTTCAITGTCGTTCCATTCATATGCTTTTATCTCCAAGAGCTGATTTAGGCTATCCCTCACTTTGATGCTTTG
GTCTGCATATGGACTCCAGTCGGTACTCCATCCCAAAAAGAAATTTCTGTTCTGGTCTTTCAGCCAGGTAATAAAGGGCTCAAAGTAGTTGAGCAGTGGCCTTACAT
CATGTTCTTGTCTCTACAACATTTTCCAATGCTAGGGTCCAGGGTCTGATTTTCCAAGCCACAGCATAITGAACAGTTTCTGTCCAGCTCTGTAGAGTTTGGAGATG
TCACATTTGTGCAGAGGGCCCTCATGTTTAGCTGCTTGCAAAAGTGTCTTGAACATGGAAATGGTAAAGGGTCCCTGTGTAATATCGAATGAATGAGTAATCATA
GAAACATGGAAACAGAGATCGGGGGTTCACAGTATGTTTCAATCATGGGGCACAGGTTCCACCACCCCAACTATCTCTCGTTCATCTCCCACTTTTTCATCCACTGG
TCITTTGGGAATTTCCCTTTAAAGACCATCCACTCCACTTCTCTAACATGTAAGTAAATGGCAGAGTCCCAACAATCGTGAAGTGTGTTGAGCAGGAAAGTTAAT
CTGTTTCATGTTCTTTGAAAATCGGGGTGACAGAAGCAATGGATTTTAAATGCTTAGGTGTGGCTGCAGAAAGTACATGATTTTCCCAACAGCTTCATGGAACT
CTTCATGCTCCATTTCTTAGCAGAAAAGTTGTGCAGCATATGCCATATCAATCTGATATGCCATCTCAATGATGAGCTGTCAAGGAGGCTGTCATTCATGTCACCT
TTGTGCACATAAGGATCCTGAAGTCGCCCTTCCCAAGGTCCTGAGGATGGCAGACTGCTTCTGAACATTTCTGGGTCGGTGTAGCATGGAATTTTCCAGA
ATCTTTGAGTCATATTAGGAAGACCAACAGATACAAAAGAACTTCTCGGCCCTTGAATATTTCTGTGTCATCCCAGGCTGGTCCACCATTGCATCAGTAACTATA
TGTTTGGTTTCTGTCCAAAGGGAATGTCAAAGAGTACAGATTTGTCCAAAATCTACCCACATATCACCACAAAGCAATGAGCAGGAGGCATCCAATTTGGACTGAT
AGGAAGGATAGGCATTCATCAACTTTGCCCTCACAATAGGCATGAAGATGTCATATAATGGTTTAAATCTTCAAAGGATGTTCCACATCTTCAATCAACTGGCCGC
GGCTGTAGTCATAGCCATCACTCCCAATTTACTTCATAGTCTCCTTCCCAATAATCCCATAATGCTCATAATGATTTGCTCTGGCATCTCAATTTTCAAGACACATA
CTTCTCATATAATGGCCCTAGCTGCTTGGCCACTCAGATCTCAGCTTTCCCAAGCCAGAGCCCTCTCATTTGATGCTFAAATGTTGGCATTATTTCAACAACT
GGTTCAAGTAATAGCATCTTGTGGATTCGGGTTACAACATTTCCAGACTGTGAGATTTGGTCTCATTTGATTTAGAATTGTTTCAACCCGTTGCTCTGTGCTT
CTGAGAGCACTGAAGACCCATTTTGTGTAAGAGCCGTGCAGCTGAAGCTGTGACTGTGAGATTTGAAATTTCTGTGATGGATACATTTGGGCAAGTGTGGACTGTCTCT
TTAAAAGGCGACAGCAATTTGTCCCAAGCATTTTTCATGTTTGGACATTTCTTCCAGTAAATTTGGTGTATAATTTCCAAGAAAGCAAGTGAACCTTTGATAGAACAGGCT
TTCCGCTTCGTGGTTTAACTTGGCTTCCAAAAGTGTCTTGGCCTGTTCCTCAATGTGGACTGAGCAGCAGTTCACAGCAACAAGGCTGAGAAAGGAGCCAGGAAGAGCTTG
ACATGGTGGCGGGTTGGGCATGGAAGAAATGCGAAGATTGCGGCTGCGCATCGATAAAAATAAAGATTTTATTTAGTCTCCAGAAAAGCCCGGATAACTTCGTAT
AAGGTATCCTATACGAAGTTATCCATTGAGGCTGTGCTAGCATCAATGGCATGGCACAAAGCTTAGCCATAACTTCGTATAATGTGTACTATACGAAGTTATTTCTAAG
CTAGCCCTTTCTGTTATAGTAAAATCATAGTACACCCCTCCTCCAGCTGTATCTTTAACAGCTTTTAAAGGAACATATAACTTAAATGTCCAGGTTTGTATTGGCCA
TAAAATGTTAGCAAAGCTAAGGTTTCTAGGATTAATGAATAACATGCTTTATTAGTTTACTTAAAAAATCATCTTAAAATATCTGTTACATATCTGTCTCTCCA
GGATTAACCTCATAITGGTCCAGCAGCTTGTTCAGTGTCTTCTGTTTCTTCTGCTTTTTTTTTTCTCTCTCTCAGTGGCCCAACAGGTTCAAAAGGCTGATGA
GAGAGAAAACCTCATGAAGAGATT
    
```

**Models #25, #26 and #27**

- 25) *B6.mAce2<sup>CKO</sup>-hACE2-P2A-hTMPRSS2<sup>CKI</sup>*
- 26) *NSG.mAce2<sup>CKO</sup>-hACE2-P2A-hTMPRSS2<sup>CKI</sup>*
- 27) *BALB/c.mAce2<sup>CKO</sup>-hACE2-P2A-hTMPRSS2<sup>CKI</sup>*

Notes: These are the same as models #22-#24 except that both hACE2 and hTMPRSS2 will be expressed instead of just hACE2.

Sequence near the insertion site (the cleavage location expected for the chosen guide RNA is marked as ‘/’).

**aggctataagttccaatatgtgtcccatg/atttctaagtctagccctttctgttatagta**

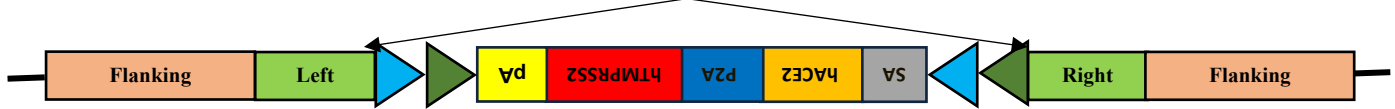

The gRNA sequence (in the intron 1) is GGGCTAGACTTAGAAATCAT [GGG].

Sequence of the mAce2<sup>CKO</sup>-hACE2-P2A-hTMPRSS2<sup>CKI</sup> ssDNA:

AGCTCTAGCTGTCTTGTGTTGATGACAAAGCTGTCTCAAACCTCAGAGATCTTCTCTCTTGTCTCCTGAGTGTGGGATTAAAGGCATGGACCACCA  
 CTGCCCTGCCCATCTCTCCATTAATTTAAAGTGAATGCTTGCAAAAAGCTCACTCTTGGTGAACAGCTTCTCTTAAACAATAAGTACCTTTGCCTTCGT  
 TTTTATAGGATCTTAAAAAGAAAAAAGATTCCAGCCAGGTGGTGTGGTGCACACCTTAAATCCAGCAGTCCAGGAGAGAGAAAGCAGATCTCT  
 TGAGTTTGAGGCTAGCTAGCTACAGAGGGAGTCCAGGACGCCAAGGCTCAGAGAGGAACCTTAAAAACACCAAGAGAGAGAAAGGAGAG  
 AGGGAGGAGGATGGATAGCTTTATGTATAGAATTGTTCAGAAAAGCTATAAAGTTCCAATATGTGTCCCATGTATAAATTCGTATAGGATACCTTATACGAAGT  
 TATCTCAGCTAGAAGCCATAAATCTGTATAGTACACATTAACGAAGTTATGTTTATCGAATTCCTGCAGCCCGGTAGATCTTTACAATTTACGGGTAAAGATA  
 CATTGATGAGTTGGACAAACCACTAGAATGCAGTGAATAAATGCTTTATTTGTGAAATTTGTGATGCTATTGCTTTTATTTGTAACCATATAAGCT  
 GCAATAACAAGTTAAACAACAACAATTGCATTCATTTTATGTTTCAGGTTCCAGGGGAGGTGTGGGAGGTTTTTAAAGCAAGTAAAACCTCTACAAATGTGGTA  
 TGGCTGATTATGATCAGTTATCTAGATCCGGTGGATCTTAGCCGCTCTGCCCTCATTGTGCGATAAATCCAGTCCGTTGAATCCATCACATCCCGTACACT  
 CCTGGTCTGAAGCTTTGGCACAGCCAGAACCCAGCTGTATCCCTATCAGCCACAGATATTGTTCTCGAAGTGACCAGAGGCCCTCCACTGTCA  
 CCTGGCAAGAATCGACGTTCCCTCGCAGGAAGCCGGCACAGATCATGGCTGGTGTGATCAGGTTGTATAGACATATCTGCTGTTCATCTCTGTGTC  
 TCAATGAGAAGCACCTGGCAGCGTTCAGCACTTCTGAGTCTTCCCTTCTCTCGTGGCCCCCACCAGAAATCCAGCAGAGCTGTCTGGTCTG  
 AGCATCATGCCCTGGGTTGGGCAGACACACTGGTTTCACTAGGTCGTTGAAAGTCAGAGGCTTCTGCAGCTTCATCAGCCCAATGTCAATTTCTGGT  
 TTGGAGTCATAAATTTGGATGAGAAATCACTTTTCTACTTGGTATCCGGTCCATAGAACATGAAAGATTGTCTCAAATCCCGCAATCCCGTCCAAAT  
 GCCATGGATTGTTAAGAGGTTTTTCCACGCAGTGGGGCGGTGTCACGATCCACTCGGGGTGATGATGGAGCCTCCGCACACAGCTGGACGTTCTGGACG  
 TGCAGGCTGACCTGCCAGGGCCAGGCCCGGGAGCGGCTCTCGCCGCCACAATCTGCTCTGGCGGCTGAGTTCAAGTTGACCCCGCAGGCTAT  
 ACAGCGTAAAGAAACCACTGCTTTGAAAGAACAGGCATCACTGTGGTACAGTTTATATAGATATCGACATTCGCCGCACTTGTGTTCAAGTTTCAAAAG  
 CTGGTGGATCCGCTGTACCCACTATTCCTTGGCTAGAGTAAAAAATTTCTTATAGCCCATTCCTCGCAGGCCCGCCGCGTAGTCTCGTTCAGT  
 CGTCTTGGCACAGGTTGCCAGGACTTCTCTGAGATGAGTACACCTGAAGGATGAAGTTGGTCCGTAGAGGCGAACACAGCATTCTGCTCCCTCC  
 CGCCGGGCAGTGTGACAGCCATCACACCAGTTAGAGGGTTGATGCAGTACTGAGGAGTCCGACTCTATCCAGACTTGGAGCACTTCTGCTGCC  
 ATGAACCTCCAGAGTAGGCCAGCGCCAGCGCAGCTCCACAGGAAAGGTTCCAGGGTCAAGGTGATGCACAGTCTTCTTAGTCTTTGAGGTGCA  
 CACTGTCCCGGATGGGGATTTGGGCTGCGTGCAGACGACGGGTTGGAAGCTCGCTCAGGACCCTCGGGGCGTACTGGGGCAGCGGGGACGGGTG  
 TACTGACCCGGATGCACCTGTAGACAGTGGGGACACAGTGGGCTGTCCGGGATGAGGGGTTTTCCGGTGGTATCCAGTTTCAAGTAAAGTTCA  
 ATAGCTGGTGGTACCCTGAGTTCAAAGCCATAGGTTCCAGGGTCTCTCCACGCTCTCCAGCCTGCTTCAGCAGGCTGAAGTTAGTAGTCCCGCTTCCA  
 AAGGAGGTTCTGAACATCATCAGTGTTTGGAAATCTGGATTATTTTCTCTTGTCTAATATCGATGGAGGCATAAGGATTTTCTCCACTTCTTGTCTTAT  
 TTTCTTCCGATCTCTGATCCCAAGTGAAGATCAGGATGACAATGCCAACCACTATCACTCCCATCACAACTCCAAAAACAATCAGCCATATGGAAACA  
 CGGGGCTGGTTAGGAGGTTCAAGTGTGGCTGTATCCCGCAAACTTAGGCTGTGTGATTCAGACGGAAAGCATCATGTATCAAGCTCCCGGACATC  
 CTTGCTTGGAAATTTCCCTTTAAAGACCAATCCACCTCCACTTCTTAACATGTAAGTAAATGGCAGAGTCCCAACAATCGTGAAGTCTGTTGAGCAGG  
 AAGTTTATTTCTGTTTCAATTTGCTTCTTGAATAATCGGGTGACAGAAGAACCAATGGATTTTAAATGCTTAGGTTGGCTGCAGAAAGTACATGATTTCC  
 CAACAGCTTCATGGAATCCTTCAATAGTCCATTTCTTAGCAGAAAAGGTTGTGCAGCATATGCCATATCATACTGGATATGCCCCATCTCATGATGAGC  
 TGTGAGGAAGTCGTTTATGTCACCTTTGTGCACATAAGGATCCTGAAAGTCCGCTTCCAGGTCCTCAAGCTGTGGGATGGCAGACTGCTTCTGAA  
 ATTTCTGGGTCGTTAGCATGGAATTTCCAGAAATCCTTGAATCATATTGAAAGACCAACAGATACAAAGAACTTCTCGGCTCCTTGAATATTCTC  
 TGTGCATCCAGGCTGGTCCACCATTGCATCAGTAACATCTATGTTGGTTTCTGTCCAAAGGAACTGTCAAAGAGTACAGATTGTTCCAAAATCTAC  
 CCCATATACCAAGCAAAATGAGCAGGGAGGCATCCAATGGACTGATATAGGAAGGATAGGCATTCATCAACTTTGCCCTCACATAGGCATGAAGAT  
 GTTCATATAATGGTTTAAATCTCTTCAAAGGATGTTCCACATCTTCAATCAACTGGCCCGCGGCTGTAGTCAATAGCCATCACCCATTTACTTCATAGTCT  
 CCTCTCAAATAATCCCATAGTCTCATAATGTTGCTCTTGCCATCTCATTTTCAAAGACCACATACTTTCATATAATGGCTCAGTCTGTTGCCAG  
 CTCAGATCTCCAGCTTCCCAAGCCAGAGCCTCTATTGATGCTAAACCTGTTGGCATTATTTCAATCAAACCTGGTTCAAGTAAATCAAGATTTCTGTG  
 GATTATCTGGTTACAAAATTTCCAGTACTGTAGATGGTGTCTATTGTATTTAGAATTTGTGTTCAACCGTTTGTCTTCTGAGAGCACTGAAGA  
 CCCATTTGTGTAAGAGCTGCAGCTGAAGCTTGACTGTGAGATCTGAAATTTCTGTAGTGGATACATTTGGGCAAGTGTGGACTGTTCTTTAAAAAG  
 GCAGACCAATTTGCCAGCATTATTCATGTTTGGACATCTCTCAGTAATATTGGTGTATAAATCCAAAGAAGCAAGTGAACCTTGATAGAACAGGT  
 CTTCCGCTTCGTGGTTAACTTTGCCAAAATGCTTGGCGTCTGCTCAATGGTGGCAGTGAAGCAGTTACAGCAACAAGGCTGAGAAGAGCCAGG  
 AAGAGCTTGACATGGTGGCGGGTGGGCACTGGAAAAGAAATGCAAGGATTTGCGCTGCGCATCGATAAAAAATAAAGATTTTATTAGTCTCCAGAAAA  
 GCCCGGATAACTTCGTATAAGGATCCCTATACGAAGTTATCCATTACGGCTGTGATGATCAATGGCATGGCAGCAAGGCTTACCCATCAAGCTCGTATAATGT  
 GTACTATACGAAGTTATTTCTAAGTCTAGCCCTTTCTGTATATAGTAAATCAATAGTACACCCCTCTCTCCAGTGTATCTTTACAGCTTTTAAAGGAAC  
 ATATTAATAAATGTCAGGATTTGATTTGGCCATAAATGTTAGCAAAAGCTAAAGTTTCTAGGATTAATGAATAACATGCTTTTATTAGTTTAA  
 AAAAATCATTTCAAATATCTGTTTACATATCTGCTCTCCAGGATTAACCTCATATTGGTCCAGCAGCTGTTTACTGTTCTTCTGTTTCTTCTG  
 CTTTTTTTTTCTCTCTCTCAGTGCCCAACCAAGTTCAAAGGCTGATGAGAGAGAAAAACTCATGAAGAGATTT

Models #28, #29 and #30

- 28) *B6.mAce2<sup>CKO</sup>-hACE2-IRES-hTMPRSS2<sup>CKI</sup>*
- 29) *NSG.mAce2<sup>CKO</sup>-hACE2-IRES-hTMPRSS2<sup>CKI</sup>*
- 30) *BALB/c.mAce2<sup>CKO</sup>-hACE2-IRES-hTMPRSS2<sup>CKI</sup>*

Notes: These are the same as models #25 to #27 except that IRES is used instead of P2A.

Sequence near the insertion site (the cleavage location expected for the chosen guide RNA is marked as '/').

aggctataagttccaatatgtgtcccatg/atttctaagtctagccctttctgttatagta

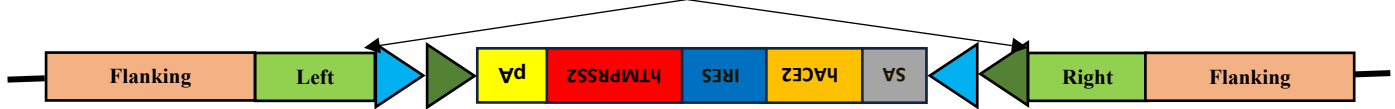

The gRNA sequence (in intron 1) is GGGCTAGACTTAGAAATCAT [GGG].  
 Sequence of the mAce2<sup>CKO</sup>-hACE2-IRES-hTMPRSS2<sup>CKI</sup> ssDNA:

AGCTCTAGCTGCTTTGATTGGTAGACAAAGCTGTCCTCAAACCTCAGAGATCTTCTCTCTTTGTCTCCTGAGTGCTGGGATTAAGGCATGGACCACCA  
 CTGCCCTGCCCATCTCTCCATTAATTTAAGTGAATGCTTGCAAAAGCTCACTTCTTGGTGAACAGCTTCTTTACAATAAGTACCTTTGCCCTCGT  
 TTTTATAGGATCTTTAAAAAAGAAAAAAGATTACAGCCAGGTGGTTGGTGCACACCTTTAATCCAGCAGTCAGGAGGCAGAGAAAGCAGATCTCT  
 TGAGTTTGAGGCTAGCCTAGTCTACAGAGGGAGTTCAGGACAGCCAAAGGCTACAGAGAGGAAGCTGTCTAAAAACCAAGAAAGAGAGAAAGGAGAG  
 AGGGAGAGGATGGATAGCTTATTGATAGAATTGTGAGAAAGGCTATAAGTTCCAATATGTGCCCATGATAACTTCGTATAGGATACCTTATACGAAGT  
 TATCTCAGCTAGAAGCCAATACTCGTATAGTACACATTATACGAAGTTATGTTTATCGAATTCGATTCGAGCCCGGTAGACTTTTACAATTTACCGCTTAAGATA  
 CATTGATGAGTTTGGACAAACCAACTAGAAATGCAAGTAAAAAATGCTTTAATTTGTGAAATTTGTGATGCTATTGCTTTAATTTGTAACCATTAAGCT  
 GCAATAACAAGTAAACAACAACAATTGCATTCATTTATGTTTTCAGGTTTCAGGGGAGGTGTGGGAGGTTTTTAAAGCAAGTAAAACCTTACAATATGGTGA  
 TGGCTGATTATGATCAGTTATCTAGATCCGGTGGATCCTTAGCCGCTCTGCCCTAATTTGTGCATATAAATCCAGTCGCTGATACCATTCACATTCCTGACACT  
 CCTGGTCTGTAAGCTTTGGCACAGCCAGAACCCAGCTTGTATCCCTATCAGCCACAGATATTGTTCTCGAAGTGACCAGAGGCCCTCCACTGTCA  
 CCTGGCAAGAATCGAGTTCCTCGCAGGAAGCCGGCACAGATCATGGCTGGTGTGATCAGTTGTGCATAGACATATCTGCTGTTCATCTCTGTGTC  
 TCAATGAGAAGCACCTTGGCAGCGTTCAGCACTTCTGAGGTCTTCCCTTCTCCTCGGTGGCCCCCACCAGGAATCCAGCAGAGCTGTCTGGCTGC  
 AGCATCATGCCTGGGTTGGGCAGACACTGGTTTCACTAGGTCGTTGAAAGTCAGAGGCTTCTGCAGCTTCACTAGCCCAATGTCATTGTTCTGGTTC  
 TTGGAGTCATAATTTGGATGAGAAATCACTTTTCTACTTGGTATCCGGCTCATAGAACATGAAAGATTGTCTCAAAATCCCGCAAAATGCCGTCCAAT  
 GCCATGGATTGTAAAGGTTTTTCCACCGCAGTGGGGCGGTGTCAAGTCCACTCGGGGTGATGATGGAGCCTCCGCAACAGCTGGAGCTTCTGGAGC  
 TGCAGGTGACCTCCAGGCCCGCCGGGAGCGCGCTCTCCGCCCCACAATCTGCTCTGGCGGCTGAGTTCAGTTCAAGTTGACCCCGGACTAT  
 ACAGCGTAAAGAAACCACTGCTTTGAAGAACAGGCATCACTGTGGTACAGTTTTTATAGATATCGACATTGCCGGCACTTGTGTTCAGTTTCATAAAG  
 CTGGTGGATCCGCTGTACACTATCTTGGCTAGAGTAAAAATTTCTTATAGCCATGTCCTCGAGCCCGCCCGCCGCTAGTTCCTGTTCCAGT  
 CGTCTGGCACACAGGTTGCCAGGACTTCTCTGAGATGATCAACCTGAAGGATTTGGTTCCTGAGAGGCAACCCAGTCTCTGCTTCCGTTCCGTTCC  
 CGCCGGGCACTGTGACAGCCATCACACAGTTAGAGGGTGTGATGAGGTAACCTGAGGAGTCCACTCTATCCAGAGTTGGAGCACTTGTGCC  
 ATGAACCTCCAGATAGGCGAGCCGAGCCAGCTCCACAGGAAAGTCCACAGGTCAGGTTGATGCACAGTGTCTTCTAGTCTTTGAGGTGCA  
 CACTGTCCCGGATGGGATTTGGGCTGCGTGCAGACGACGGGTTGGAAGCTGCTCAGGACCTCGGGGCGTACTGGGGCACGGGGGACGGGTAG  
 TACTGAGCCGGATGCACCTCGTAGACAGTGGGGACACAGTGGGCTGTCCGGGATAGGGGTTTCCGGTGGTATCCATGGTTTTCAATAGTAAGTCCA  
 ATAGCTGGTGTGACCTGAGTCAAAGCATTATCATCTGTTTTCAGGAAGAAACCAAGTCCCGTGGTTCGGGGGCTGACGCTTTTTTAAC  
 TCGACTAAACACATGTAAAGCATGTGCACCGAGGCCCCAGATCAGATCCCATACAATGAGGTTACCTTCTGGGCATCTCCAGCCCTTGTGAAATCCG  
 TTGAGGAGGCCATTTGACTCTTCCACAATTCACCACTCAACAGTGGCAGTGGGTTGTGCCGCTTTGCAGGTGTATCTTATACAGCTGGCTTTG  
 GCCGACAGAGCCCTGTCCGCGAGGTTCCCGTGCCTGCAAAAGGCTGCTCAGACAGTGTGTTGTCTTCAAGAAGCTTCCAGGAACTGCTT  
 CCTTACGACATTCACAGACCTTGCATCTCTTGGCAGAGGGGAAAGACCCTAGGAATGCTCGTCAAGAAGACAGGGCCAGGTTTCCGGGCCCTCA  
 CATTGCCAAAAGACGGCAATATGGTGGAAAATAACATATAGACAAACGACACCCGGCTTATTCAGGCGGCTTCGGCCAGTAACTGATGGGGGGG  
 GAGGGAGAGGGGCTAAAAGGAGGTTCTGAACATCAGTGTGTTGAACTCTGGATATTTTCTCCTTTGGTAATATCCGATAGGAAATGATTTTTC  
 TCCACTTCTGTTATTTTCTCTTCCGATCTGTATCCAGTGAAGATCAGGATGACAATGCCAACCACTATCACTCCATCACAATCCAAAACAA  
 TCAGCCATATGAAACACCTGGTTAGGAGTCCAAGTGTGAGTGTATCCCGAAGTCTAGGCTGTGTCTCCTCAGCAGGAAAGCATCATTGA  
 TACGGCTCCGGGACACTCGTATGGCTTTTCAACTTTCAGTCTAGGAATGATATCAGACACATTTTATAGTGCAGTGACAAAAGAAATTAAGAGGATTTCT  
 TGGTTTCAAATTAGCCACTCGCATCTCCTCCTCCCAAAAAGAAATCATCTGATTTTAACTTTAAAAAGTACTGCCTCATAGCATATGCAACAGATGATC  
 GGAACAGGTACATTTCAATGCTTCCATCATATGCTTTTATCTCAAGAGCTGATTTAGGCTTATCTCACTTTGATGCTTTGGTCTGCATATGGACTC  
 CAGTCCGTAATCCATCCCAAAAAGAAATCTTGTCTTGGTCTTTCAGCCAGGTAATAAGGGCTCAAAGTAGTTGAGCAGTGGCCTTACATTCATGTTCT  
 TTGCTCTACAACATTTTCCAATGCTAGGGTCCAGGGTCTGATTTTCCAAGCTCAGCATATGAAACAGTTCCTGTCAGCTTCTGTAGAGTTTGGAT  
 GTCACATTTGTGCAGAGGGCCCTCATGTTTAGCTGTGACAAAAGTGCCTTGTGAAAATGGAATGGTAAAGGGTCTTGTGTAATATCGAATGAATGAG  
 TAATCATTAGAAACATGGAACAGAGATGCGGGGTCAGATGTTTCACTAGGTCAGGTCACAGGTTCCACCACCCCACTATCTCTGCTTCACTCCCAAC  
 ACTTTTTCACTACTGCTCTTTGGGAAATTTCCCTTAAAGACATCCACTTCACTCTTCAACATGTAAGTAAATGCCAGAGTCCCAACAATCGTGAG  
 TGCTTGTGAGCAGGAAGTTAATTTCTGTTTCAATGTTCTTGTGAAAATCGGGTGCAGAGAAGACCAATGGATTTTAAATGCTTAGGTGTGGCTGCAGAA  
 AGTGACATGATTTCCCAACAGCTTCAATGGAATCCTTCAATAGCTCCATTTTATAGCAGAAAAGGTTGTGCAGCATATGCCATATCACTGGATATGCC  
 CCATCTCATGATGAGCTGTACAGGAAGTCGTCATGTCACCTTGTGACACATAAGGATCCCTGAAGTGCCTTCCCAAGTCCCAAGCTGTGGGATGCC  
 AGACTGCTTCTGAACATTTCTGGGTCGTTAGCATGGAATTTCCAGAAATCCTTGTGATCATATTAGGAAGACCAACAGATACAAAGAAGTCTCGGC  
 CTCCTTGAATATTTCTGTGCATCCAGGCCCTGGTCCACATGTCATCAGTAACTATGTTTGGTTCCTGTCAAAAGGAACTGTCAAAGAGTACAGA  
 TTTGTCCAAAATCTACCCACATATACCAAGCAAAATGAGCAGGGGAGGATCCAAATGGACTGATATAGGAAGGATAGGCATTCATCAACTTTGCCCTC  
 ACATAGGCAATGAAGTGTTCATATAATGTTTAAATCTCTCAAGAGTATGTTCCACTTCAATCAACTGGCCGCGCTGTAGTCAATAGCCATCTACCC  
 CATTTACTTCAATGCTCTCTTCCAAATAATCCCATAGCTCTAATGATTTTGTCTTGGCATCTTATTTTCAAGACACATACICTTCAATATAATGGC  
 CTCAGCTGCTTGGCCAGCTCAGATCTCCAGCTTTCCCAAGCCAGAGCCTCTCATTTGAGTCTAAAAGTGTGGCATTATTTCAATCAAACCTGGTTCAA  
 GTAATAAGCATTTCTGTGGATATCTGGGTTACAAACTTTTCCAGTACTGATAGTGGTGTCTATGATTTAGAAATGTTGTTCACCCGTTTGTCTTGTCT  
 TCTGAGGACACTGAAGACCCATTTGCTGAAGAGCTGCAGCTGAAGCTTACTGTGAGATTCTGAATTTCTGTAGTGGATACATTTGGGCAAGTGTG  
 GACTGTTCTTTAAAAAGGACAGCAATTTGTCCAGCATTTTCAATGTTTGGACATCTCTTCAAGTAAATTTGGTGTATAATTTCAAAGAAGCAAGTG  
 AACTTTGATAGAACAGGCTCTCGGCTCTGTTGTTAAACTTGTCCAAAATGTTCTTGGCCTGTTCTCAATGGTGGACTGAGCAGCAGTTACAGCAACAA  
 GGCCTGAGAAAGGACCCAGGAAAGAGCTTGAATGGTGGCGGTTGGGCACTTGGAAAAAGAAATGCGAAGATTGGCCTGCGCATCGATAAAAAAGATT  
 TTATTTAGTCTCCAGAAAAAGCCGGATAAATCTGTTACATATCTGCTTCCAGGATTAAGTCAATTTGGTCCAGGAGTGTGATGGTCCAGCAAGTGTAG  
 CCATAACTCTGATAAATGATGATACGAAAGTTATTTCTAAGTCTAGCCCTTTCTGTTATAGTAAAAATCATAGTACACCTTCCCTCTCCTGATCT  
 TTAACAGCTTTTAAAGAACATATTAATAAATGTCAGGTTTTGATTGGCCATAAAAATGTTAGCAAAGCTAAGGTTTTCTAGGATTAATGAATAACATG  
 TCTTTTATGATTTACTTAAAAAATCATTCTAAATATCTGTTACATATCTGCTTCCAGGATTAAGTCAATTTGGTCCAGGAGTGTGTTACTGTT  
 CTCTTCTGTTCTTCTGCTGTTTTTTTTTCTTCTCTCTCTCAGTGGCCAAACCAAGGCTTCAAGGCTGATGAGAGAAAAAATCATGAAGAAAT
